# Supplementary material for: Development of a confinable gene drive system in the human disease vector Aedes aegypti
Source: eLife. 2020 Jan 21;9:e51701. doi: 10.7554/eLife.51701 (PMC6974361; doi:10.7554/eLife.51701)
Supplement: Figure 1—source data 1. [file elife-51701-fig1-data1.xlsx]

## Sheet: Figure 1 source data 1
Figure 1- source data 1: The metadata of the Aedes aegypti whole-genome sequences.
				Total raw reads:	17.1	Gbp
				Total mapped reads:	16.7	Gbp					143
				Median mean nuclear genome depth per individual:	9.6	X		17124990827	16729038120	9.6	10.6
banked_sample_id	Collection Location	Disctrict	Country	Date	lat	lng	sex	L5 raw Reads	L5 mapped reads	L5 mean cov	white sgRNA target site (1:107,955,440-107,955,462) cov
Ae14SAMC001	Menlo Park	San Mateo	USA	2014	37.4341	-122.197	f	107886934	105220789	9.8	14.8
Ae15SAMC004	Menlo Park	San Mateo	USA	2015	37.4351	-122.206	?	104721488	102296000	9.3	4.4
Ae15MADE001	Madera	Madera	USA	2015	36.9626	-120.106	f	126049397	123451346	11.3	9.3
Ae15MADE015	Madera	Madera	USA	2015	36.9267	-120.05	f	102961586	100043157	9.2	13.9
Ae17MAD035	Madera	Madera	USA	2017	36.9631	-120.081	f	104651908	101560332	8.9	7.9
Ae15FRES008.05	Fresno	Fresno	USA	2015	36.8037	-119.803	f	97580781	95585559	8.8	12.5
Ae15FRES017	Fresno	Fresno	USA	2015	36.84	-119.905	f	105520397	103047532	9.4	4.5
Ae17FRE011	Fresno	Fresno	USA	2017	36.7677	-119.883	f	278195878	272440645	24.2	23
Ae13CLOV028	Clovis	Consolidated	USA	2013	36.8134	-119.667	f	101880672	100064155	9.2	11
Ae13CLOV030	Clovis	Consolidated	USA	2013	36.8132	-119.67	f	107571769	105549864	9.6	9
Ae13CLOV032	Clovis	Consolidated	USA	2013	36.8117	-119.669	f	98922199	97408592	9.1	5.2
Ae13CLOV037	Clovis	Consolidated	USA	2013	36.8147	-119.672	f	94614830	92418920	8.4	6
Ae13CLOV038	Clovis	Consolidated	USA	2013	36.8147	-119.669	f	92736891	90629009	8.3	11.4
Ae13CLOV039	Clovis	Consolidated	USA	2013	36.8147	-119.667	f	102726096	100387133	9.1	12.6
Ae13CLOV040	Clovis	Consolidated	USA	2013	36.815	-119.665	f	119553993	116890330	10.3	9.5
Ae13CLOV041	Clovis	Consolidated	USA	2013	36.8129	-119.672	f	104564311	101940312	9.1	12
Ae13CLOV042	Clovis	Consolidated	USA	2013	36.8095	-119.671	f	107421472	105180191	9.6	11.6
Ae13CLOV043	Clovis	Consolidated	USA	2013	36.8112	-119.672	f	117728993	115009625	11.1	10.6
Ae16CLOV002	Clovis	Consolidated	USA	2016	36.8202	-119.675	f	183204460	178740970	16.7	20.2
Ae16CLOV003	Clovis	Consolidated	USA	2016	36.8202	-119.675	f	105758312	103195414	9.8	4
Ae16CLOV007	Clovis	Consolidated	USA	2016	36.8054	-119.668	f	223130840	219747563	20.2	27.3
Ae16CLOV008	Clovis	Consolidated	USA	2016	36.7904	-119.651	f	99155870	96636606	8.8	12.1
Ae16QUAI16.42	Clovis	Consolidated	USA	2016	36.7941	-119.597	m	191881776	186077542	16	16.3
Ae16QUAI16.44	Clovis	Consolidated	USA	2016	36.8049	-119.597	f	97394756	95290335	8.7	5
Ae17FRE005	Kerman	Fresno	USA	2017	36.7275	-120.069	f	132064752	129205032	12.2	13.4
Ae17FRE006	Kerman	Fresno	USA	2017	36.7213	-120.051	f	127110893	124285155	11.3	5.5
Ae17FRE018	Kerman	Fresno	USA	2017	36.7242	-120.077	f	126415120	123668691	11.1	7.9
Ae15SANG073	Sanger	Consolidated	USA	2015	36.7224	-119.506	f	108492790	105836704	9.6	8.9
Ae17CON058	Sanger	Consolidated	USA	2017	36.7142	-119.582	f	109470148	106958921	9.7	7
Ae17CON075	Sanger	Consolidated	USA	2017	36.7006	-119.547	f	86826353	84843868	7.6	5.6
Ae17CON069	Fowler	Consolidated	USA	2017	36.6362	-119.686	f	135679156	132442966	12.2	14.6
Ae17CON097	Fowler	Consolidated	USA	2017	36.6256	-119.688	f	110997953	108274011	9.8	6.9
Ae17CON112	Fowler	Consolidated	USA	2017	36.6362	-119.669	f	101229075	99271661	9.3	12.8
Ae17CON035	Reedley	Consolidated	USA	2017	36.5876	-119.45	f	113206371	111154587	10.3	8.1
Ae17CON038	Reedley	Consolidated	USA	2017	36.6149	-119.444	f	124572951	122245692	11.5	11.5
Ae17CON093	Selma	Consolidated	USA	2017	36.5814	-119.606	f	232109515	227738358	21.4	13.5
Ae17CON094	Selma	Consolidated	USA	2017	36.5729	-119.605	f	176657311	173402799	16.4	15
Ae17CON022	Kingsburg	Consolidated	USA	2017	36.5331	-119.552	f	98542840	96491425	9.1	12.7
Ae17CON033	Kingsburg	Consolidated	USA	2017	36.5139	-119.56	f	97335091	95395065	9	6.9
Ae17CON056	Kingsburg	Consolidated	USA	2017	36.5123	-119.544	f	116360322	113880477	10.5	10.5
Ae17CON074	Laton	Consolidated	USA	2017	36.4386	-119.685	f	109071861	106811349	10	13
Ae17CON114	Laton	Consolidated	USA	2017	36.4363	-119.684	f	93040706	91248616	8.5	7
Ae17CON124	Laton	Consolidated	USA	2017	36.4332	-119.684	f	94234034	92384164	8.5	5
Ae17KIN071	Hanford	Kings	USA	2017	36.3532	-119.654	f	109496803	107288226	9.5	10.9
Ae17KIN072	Hanford	Kings	USA	2017	36.3019	-119.655	f	103536461	101475977	9.6	18.3
Ae17KIN092	Hanford	Kings	USA	2017	36.3555	-119.641	f	96517352	94542583	8.7	4.3
Ae17TUL011	Visalia	Tulare Delta	USA	2017	36.3259	-119.306	f	105210822	102327517	9.6	12
Ae17TUL041	Visalia	Tulare Delta	USA	2017	36.3199	-119.311	f	108836896	105444304	9.6	16.087
Ae17TUL076	Visalia	Tulare Delta	USA	2017	36.322	-119.307	f	100211545	98051953	8.7	17
Ae17KIN068	Lenmoore	Kings	USA	2017	36.3129	-119.786	f	102487041	100095947	9.4	8.3
Ae17KIN077	Lenmoore	Kings	USA	2017	36.3104	-119.783	f	100994769	98855270	9	8.5
Ae17KIN096	Lenmoore	Kings	USA	2017	36.3111	-119.788	f	117959570	115940022	10.9	9.9
Ae17TUE020	Tulare	Tulare	USA	2017	36.2317	-119.327	f	135904694	133202963	12.1	13.7
Ae17KIN089	Corcoran	Kings	USA	2017	36.0998	-119.568	f	206326426	202330056	18.1	19.9
Ae17KIN091	Corcoran	Kings	USA	2017	36.0988	-119.571	f	101280810	99303273	9.3	10.3
Ae14EXET135	Exeter	Tulare Delta	USA	2014	36.3007	-119.155	f	126547689	123800447	11.4	15.6
Ae14EXET165	Exeter	Tulare Delta	USA	2014	36.3038	-119.158		107654067	105201204	9.7	8.1
Ae14EXET174	Exeter	Tulare Delta	USA	2014	36.3011	-119.156		279581677	274174009	24.7	17.8
Ae15KER005	Arvin	Kern	USA	2015	35.2012	-118.839	f	96046725	93806436	8.8	8.4
Ae17KER001	Arvin	Kern	USA	2017	35.2116	-118.839	f	89762088	87523762	8.4	7.6
Ae17SGV011	Alhambra	San Gabiel Valley	USA	2017	34.0973	-118.119	f	103380910	99855864	9.3	11.4
Ae17SGV016	Alhambra	San Gabiel Valley	USA	2017	34.083	-118.159	f	95628284	93447791	8.9	10.7
Ae17SGV077	Alhambra	San Gabiel Valley	USA	2017	34.0749	-118.149	f	141906963	139161991	12.6	14
Ae17SBC002	Colton	San Bernardino	USA	2017	34.0735	-117.308	f	93221305	91253597	8.5	6
Ae17SBC033	Colton	San Bernardino	USA	2017	34.0759	-117.347	f	110643306	100645955	9.4	10.9
Ae17SBC036	Colton	San Bernardino	USA	2017	34.0576	-117.332	f	113454064	110681816	9.6	12.3
Ae17SGV078	Pomona	San Gabiel Valley	USA	2017	34.0663	-117.745	f	138814911	135908362	12.2	17.1
Ae17SGV098	Pomona	San Gabiel Valley	USA	2017	34.0648	-117.766	f	141024267	138348369	12.6	12
Ae17GLA002	ELA	Greater LA	USA	2017	34.0137	-118.141	f	114295114	111660344	9.9	7.6
Ae17GLA006	ELA	Greater LA	USA	2017	34.0352	-118.154	f	94868578	92567117	8.9	7.1
Ae17GLA017	ELA	Greater LA	USA	2017	34.0519	-118.194	f	97698852	95656744	9.1	11.9
Ae16COMF3.001	ELA	Greater LA	USA	2015	34.0074	-118.165	f	96920950	94384861	8.6	8.2
Ae17SGV001	Montery Park	San Gabiel Valley	USA	2017	34.0391	-118.149	f	153340464	149662334	14.4	15.1
Ae17SGV002	Montery Park	San Gabiel Valley	USA	2017	34.0391	-118.149	f	138415036	135257658	12.5	13.3
Ae17GLA005	Hacienda Heights	Greater LA	USA	2017	34.0176	-117.979	f	93124308	90783279	8.6	7.6
Ae17GLA001	Whittier	Greater LA	USA	2017	33.9513	-118.043	f	130310466	127221280	11.4	11.2
Ae17GLA013	Whittier	Greater LA	USA	2017	33.9206	-118.021	f	130096249	127242864	11.6	13
Ae17GLA016	Whittier	Greater LA	USA	2017	33.9854	-118.052	f	94076955	91887810	8.6	8.7
Ae17GLA003	Downey	Greater LA	USA	2017	33.9305	-118.139	f	97520386	95276567	9	8.5
Ae17GLA008	Downey	Greater LA	USA	2017	33.9468	-118.115	f	96791608	94798858	9	7.7
Ae17GLA010	Downey	Greater LA	USA	2017	33.9338	-118.156	f	114502120	112250754	10.5	10.3
Ae17ORA056	Brea	Orange	USA	2017	33.9421	-117.919	f	97348021	95497825	9.1	6.2
Ae17ORA121	Brea	Orange	USA	2017	33.9116	-117.877	f	99243807	96869747	8.7	4.4
Ae17ORA146	Brea	Orange	USA	2017	33.92	-117.921	f	112579867	110226556	10.5	9.4
Ae17ORA063	La Habra	Orange	USA	2017	33.942	-117.932	f	105325639	103212505	9.9	9
Ae17ORA131	La Habra	Orange	USA	2017	33.9213	-117.945	f	92568455	90537871	8.5	14.3
Ae17NOR001	Riverside	Northwest	USA	2017	33.9122	-117.452	f	108708815	106175034	9.7	11.8
Ae17NOR005	Riverside	Northwest	USA	2017	33.9117	-117.451	f	121956738	118946946	10.2	16.4
Ae17NOR007	Riverside	Northwest	USA	2017	33.9124	-117.452	f	117671424	114699895	10	15.7
Ae17NOR008	Riverside	Northwest	USA	2017	33.9124	-117.452	f	109312207	106634236	9.2	8.3
Ae17ORA129	La Palma	Orange	USA	2017	33.849	-118.037	f	100034818	98126432	9.3	7.9
Ae17ORA137	Stanton	Orange	USA	2017	33.8062	-117.992	f	106673859	104545807	8.9	8
Ae17ORA153	Stanton	Orange	USA	2017	33.7794	-117.992	f	94880430	93083401	8.6	7.2
Ae17ORA158	Anaheim	Orange	USA	2017	33.8375	-117.928	f	95193543	93376386	8.8	14.4
Ae17ORA170	Anaheim	Orange	USA	2017	33.8434	-117.9	f	97927160	95982627	9	12.7
Ae17ORA037	Orange	Orange	USA	2017	33.7761	-117.818	f	112083448	110159981	10.4	11.6
Ae17ORA115	Orange	Orange	USA	2017	33.7752	-117.82	f	99828523	97585021	9.2	10.7
Ae17ORA148	Orange	Orange	USA	2017	33.7969	-117.856	f	102931795	101186823	9.7	7
Ae15GARG021	Garden Grove	Orange	USA	2015	33.7627	-117.918	f	226591484	219616756	20.8	18.9
Ae15GARG026	Garden Grove	Orange	USA	2015	33.7627	-117.918	f	112418218	109830432	10.4	14.6
Ae17ORA112	Garden Grove	Orange	USA	2017	33.7721	-117.897	f	93323273	91379527	8.5	9.6
Ae17ORA169	Garden Grove	Orange	USA	2017	33.7805	-117.944	f	103946888	101610157	9.4	15.3
Ae17ORA016	Santa Ana	Orange	USA	2017	33.7711	-117.856	f	103712785	101698269	9.6	9.4
Ae17ORA058	Santa Ana	Orange	USA	2017	33.7264	-117.882	f	99196929	97288505	9.2	7
Ae17ORA090	Santa Ana	Orange	USA	2017	33.7498	-117.9	f	122273847	119413653	10.7	12.6
Ae15MISV029	Mission Viejo	Orange	USA	2015	33.6067	-117.674	f	147028171	143295334	13.3	20.9
Ae15MISV036	Mission Viejo	Orange	USA	2015	33.6067	-117.674	f	111305406	108441827	10.3	13.6
Ae17ORA161	Mission Viejo	Orange	USA	2017	33.6131	-117.67	f	100564150	98357364	9	10
Ae17ORA163	Mission Viejo	Orange	USA	2017	33.6113	-117.679	f	95352471	93332356	8.5	10.7
Ae17COA005	Cathedral City	Coachella	USA	2017	33.8181	-116.469	f	107882628	105738717	9.8	10.5
Ae17COA019	Cathedral City	Coachella	USA	2017	33.8008	-116.465	f	108211561	105871186	9.8	10
Ae17COA026	Palm Desert	Coachella	USA	2017	33.7115	-116.388	f	104807320	102251838	9.2	10.3
Ae15IMPE002	Brawley	Imperial	USA	2015	32.9742	-115.535	f	97966878	95781911	8.9	9.3
Ae17IMP009	Brawley	Imperial	USA	2017	32.9753	-115.522	f	261138408	255820714	22.8	19.4
Ae17IMP051	Calipatria	Imperial	USA	2017	33.1289	-115.515	f	102368648	100314346	9.2	8
Ae17IMP001	El Centro	Imperial	USA	2017	32.7806	-115.559	f	95059066	93122624	8.5	13.6
Ae17IMP013	El Centro	Imperial	USA	2017	32.7864	-115.543	f	114460069	112089993	10.2	6
Ae17IMP045	El Centro	Imperial	USA	2017	32.8097	-115.574	f	117493874	115462985	10.9	4.9
Ae17IMP005	Calexico	Imperial	USA	2017	32.6747	-115.515	f	116157573	113769334	10.4	16.9
Ae17IMP017	Calexico	Imperial	USA	2017	32.6656	-115.488	f	154281820	151409706	14.2	10.4
Ae17IMP021	Calexico	Imperial	USA	2017	32.6671	-115.492	f	108631264	106609095	10	14.1
Ae17SDC013	Vista	San Diego	USA	2017	33.2037	-117.25	f	106074722	103869958	9.2	10.3
Ae17SDC014	Vista	San Diego	USA	2017	33.2191	-117.248	f	101975531	100163663	9.6	6.4
Ae15SAND001	San Diego	San Diego	USA	2015	32.5556	-117.051	f	107649552	105369965	10.1	10.3
Ae15SAND002	San Diego	San Diego	USA	2015	32.5556	-117.051	f	138247704	135278276	12.8	9.1
Ae15SAND015	Chula Vista	San Diego	USA	2015	32.6034	-117.059	f	97826127	95725486	8.8	12.8
Ae17SDC004	Chula Vista	San Diego	USA	2017	32.6227	-117.048	f	94235579	92388817	8.8	12.6
Ae16VERO001	Vero Beach	Florida	USA	2016	27.5872	-80.3734	f	108854076	106490226	9.7	7.2
Ae16VERO002	Vero Beach	Florida	USA	2016	27.5872	-80.3734	f	226087066	220995657	20	17.6
Ae16VERO003	Vero Beach	Florida	USA	2016	27.5872	-80.3734	f	104430033	102233645	9.4	8.9
Ae16KEYW001	Key West	Florida	USA	2016	24.5568	-81.7829	f	111966583	109524595	10.2	10.5
2018PURI002	Guaynabo	Puerto Rico	USA	2018	18.3667	-66.1	f	104172235	101607980	9	12
2018PURI003	Guaynabo	Puerto Rico	USA	2018	18.3667	-66.1	f	100974059	98577240	8.7	8.47826
2018PURI004	Guaynabo	Puerto Rico	USA	2018	18.3667	-66.1	f	99329760	96820374	8.5	10.8696
2018PURI005	Guaynabo	Puerto Rico	USA	2018	18.3667	-66.1	f	92939500	91011120	8.1	5.26087
2018PURI009	Guaynabo	Puerto Rico	USA	2018	18.3667	-66.1	f	243195641	238014209	20.7	24.1304
2018PURI010	Guaynabo	Puerto Rico	USA	2018	18.3667	-66.1	f	98235760	95634960	8.5	8.56522
Ae16CUER001	Cuernavaca	Mexico	Mexico	2016	17.5936	-100.848	f	135471379	132716123	12.2	21.5
Ae16CUER002	Cuernavaca	Mexico	Mexico	2016	17.5936	-100.848	f	89884614	78816684	7.1	6.3
Ae16CUER025	Cuernavaca	Mexico	Mexico	2016	17.5936	-100.848	f	205840256	201750314	18.4	24.3
Ae15PRET1.3	Pretoria	South Africa	RSA	2017	-25.7461	28.1881	f	96728885	93860766	8.5	15.6
Ae15RPT1e.6	Rooipoort	South Africa	RSA	2017	-28.6372	24.28	f	97823069	95209513	8.7	7.4
Ae15SHG24.5	Shingwedzi	South Africa	RSA	2017	-23.1165	31.4301	f	236984034	227955201	19.8	27.6
