# Supplementary material for: Development of a confinable gene drive system in the human disease vector Aedes aegypti
Source: eLife journal article supplement (doi:10.7554/elife.51701), 2020-01-09
Supplement: supp4 [file elife-51701-supp4-v1.xlsx]

## Sheet: Supplementary File 4a
Legend:			Supplementary File 4a. Eye phenotypes in G1 progeny from ♂w[U6b-GDe]/w+ X ♀Cas9/Cas9.
Phenotype	code
tdTomato+	T			cross	♂w[U6b-GDe]/w+ X ♀4nitro-Cas9/4nitro-Cas9										Somatic	Transmission
tdTomato-	t				G1♀ progeny					G1 ♂ progeny					white	GDe	w-
Black eyes	W				TW	Tw	Tm	tW	tw	TW	Tw	Tm	tW	tw	mosaicism	rate	rate
Mosaic eyes	m			1	31	0	21	0	0	0	0	0	43	0	0.403846	0.547368	0
White eyes	w			2	32	0	12	0	0	1	0	0	37	0	0.266667	0.54878	0
				3	39	0	12	0	0	0	0	0	55	0	0.235294	0.481132	0
				4	28	0	17	0	0	0	0	0	46	0	0.377778	0.494505	0
				5	39	0	13	0	0	0	0	0	54	0	0.25	0.490566	0
				6	29	0	16	0	0	0	0	0	47	0	0.355556	0.48913	0
				7	47	0	14	0	0	0	0	0	56	0	0.229508	0.521368	0
				8	39	0	17	0	0	0	0	0	52	0	0.303571	0.518519	0
				9	0	0	0	50	0	57	0	21	0	0	0.269231	0.609375	0
				10	0	0	0	53	0	47	0	13	0	0	0.216667	0.530973	0
				11	2	0	0	54	0	49	0	16	0	0	0.238806	0.553719	0
				12	0	0	0	61	0	55	0	11	1	0	0.166667	0.515625	0
				13	0	0	0	45	0	43	0	14	0	0	0.245614	0.558824	0
				14	0	0	0	42	0	39	0	13	0	0	0.25	0.553191	0
				15	0	0	0	35	0	37	0	10	0	0	0.212766	0.573171	0
				16	0	0	0	63	0	58	0	19	2	0	0.246753	0.542254	0
				17	0	0	0	56	0	60	0	13	0	0	0.178082	0.565891	0
				18	0	0	0	65	0	62	0	17	1	0	0.21519	0.544828	0
				19	0	0	0	46	0	43	0	12	0	0	0.218182	0.544554	0
				20	0	0	0	54	0	49	0	11	0	0	0.183333	0.526316	0
														Average =	0.253176	0.535505	0
														St Dev =	0.0634647	0.0318835	0
				cross	♂w[U6b-GDe]/w+ X ♀trunk-Cas9/trunk-Cas9										Somatic	Transmission
					G1♀ progeny					G1 ♂ progeny					white	GDe	w-
					TW	Tw	Tm	tW	tw	TW	Tw	Tm	tW	tw	mosaicism	rate	rate
				1	6	0	36	0	0	0	0	0	43	0	0.857143	0.494118	0
				2	7	0	45	0	0	0	0	0	51	0	0.865385	0.504854	0
				3	4	0	45	0	0	1	0	0	57	0	0.9	0.46729	0
				4	13	0	40	0	0	0	0	0	58	0	0.754717	0.477477	0
				5	8	0	43	0	0	0	0	0	45	0	0.843137	0.53125	0
				6	5	0	50	0	0	0	0	0	48	0	0.909091	0.533981	0
				7	6	0	41	0	0	0	0	0	51	0	0.87234	0.479592	0
				8	16	0	46	1	0	0	0	0	65	0	0.741935	0.484375	0
				9	5	0	30	0	0	0	0	0	33	0	0.857143	0.514706	0
				10	9	0	54	0	0	0	0	0	57	0	0.857143	0.525	0
				11	0	0	0	63	0	8	0	59	0	0	0.880597	0.515385	0
				12	0	0	0	56	0	5	0	65	0	0	0.928571	0.555556	0
				13	0	0	0	46	0	7	0	43	0	0	0.86	0.520833	0
				14	0	0	0	36	0	7	0	32	1	0	0.820513	0.513158	0
				15	0	0	0	47	0	8	0	44	0	0	0.846154	0.525253	0
				16	0	0	0	42	0	7	0	48	0	0	0.872727	0.56701	0
				17	0	0	0	46	0	12	0	56	0	0	0.823529	0.596491	0
				18	0	0	0	57	0	5	0	43	0	0	0.895833	0.457143	0
				19	0	0	0	52	0	6	0	46	0	0	0.884615	0.5	0
				20	0	0	0	49	0	7	0	52	0	0	0.881356	0.546296	0
														Average =	0.857597	0.515488	0
														St Dev =	0.045954	0.034656	0
				cross	♂w[U6b-GDe]/w+ X ♀nup50-Cas9/nup50-Cas9										Somatic	Transmission
					G1♀ progeny					G1 ♂ progeny					white	GDe	w-
					TW	Tw	Tm	tW	tw	TW	Tw	Tm	tW	tw	mosaicism	rate	rate
				1	0	0	63	0	0	0	0	0	60	0	1	0.61	0
				2	0	0	55	0	0	0	0	0	47	0	1	0.63	0
				3	0	0	43	0	0	0	0	0	46	0	1	0.69	0
				4	0	0	55	1	0	0	0	1	51	0	1	0.7	0
				5	0	0	50	0	0	0	0	0	59	0	1	0.57	0
				6	0	0	53	0	0	0	0	0	51	0	1	0.74	0
				7	0	0	43	0	0	0	0	0	35	0	1	0.67	0
				8	0	0	42	0	0	0	0	0	47	0	1	0.64	0
				9	0	0	54	0	0	0	0	0	50	0	1	0.67	0
				10	0	0	0	36	0	0	0	40	0	0	1	0.68	0
				11	0	0	0	66	0	0	0	64	0	0	1	0.7	0
				12	0	0	0	51	0	0	0	56	1	0	1	0.66	0
				13	0	0	0	51	0	0	0	47	0	0	1	0.66	0
				14	0	0	0	52	0	0	0	54	0	0	1	0.58	0
				15	0	0	0	57	0	0	0	63	1	0	1	0.7	0
				16	0	0	0	55	0	0	0	49	0	0	1	0.72	0
				17	0	0	2	41	0	0	0	45	0	0	1	0.71	0
				18	0	0	0	55	0	0	0	52	0	0	1	0.62	0
				19	0	0	0	60	0	0	0	57	0	0	1	0.67	0
				20	0	0	0	41	0	0	0	45	0	0	1	0.65	0
														Average =	1	0.6635	0
														St Dev =	0	0.0451051	0
				cross	♂w[U6b-GDe]/w+ X ♀ubiq-Cas9/ubiq-Cas9										Somatic	Transmission
					G1♀ progeny					G1 ♂ progeny					white	GDe	w-
					TW	Tw	Tm	tW	tw	TW	Tw	Tm	tW	tw	mosaicism	rate	rate
				1	0	0	56	0	0	0	0	0	61	0	1	0.478632	0
				2	0	0	62	1	0	0	0	0	53	0	1	0.534483	0
				3	0	0	51	0	0	0	0	0	57	0	1	0.472222	0
				4	0	0	45	0	0	0	0	1	40	0	1	0.534884	0
				5	0	0	43	0	0	0	0	0	35	0	1	0.551282	0
				6	0	0	41	0	0	0	0	0	43	0	1	0.488095	0
				7	0	0	51	0	0	0	0	0	55	0	1	0.481132	0
				8	0	0	57	0	0	0	0	0	51	0	1	0.527778	0
				9	0	0	50	1	0	0	0	0	55	0	1	0.471698	0
				10	0	0	46	0	0	0	0	0	44	0	1	0.511111	0
				11	0	0	57	0	0	0	0	0	50	0	1	0.53271	0
				12	0	0	43	0	0	0	0	0	48	0	1	0.472527	0
				13	0	0	0	32	0	0	0	39	0	0	1	0.549296	0
				14	0	0	0	39	0	0	0	45	0	0	1	0.535714	0
				15	0	0	0	43	0	0	0	50	0	0	1	0.537634	0
				16	0	0	0	38	0	0	0	45	1	0	1	0.535714	0
				17	0	0	0	40	0	0	0	44	0	0	1	0.52381	0
				18	0	0	0	37	0	0	0	45	0	0	1	0.54878	0
				19	0	0	0	51	0	0	0	42	0	0	1	0.451613	0
				20	0	0	0	56	0	0	0	52	0	0	1	0.481481	0
														Average =	1	0.51103	0
														St Dev =	0	0.0323447	0

## Sheet: Supplementary File 4b
Legend:			Supplementary File 4b. Eye phenotypes in G1 progeny from ♀w[U6b-GDe]/w+ X ♂Cas9/Cas9.
Phenotype	code
tdTomato+	T		cross	♀w[U6b-GDe]/w+ X ♂4nitro-Cas9/4nitro-Cas9										Somatic	Transmission
tdTomato-	t			G1♀ progeny					G1 ♂ progeny					white	GDe	w-
Black eyes	W			TW	Tw	Tm	tW	tw	TW	Tw	Tm	tW	tw	mosaicism	rate	rate
Mosaic eyes	m		1	23	0	0	22	0	28	0	0	24	0	0	0.525773	0
White eyes	w		2	22	0	0	23	0	22	0	0	20	0	0	0.505747	0
			3	25	0	0	23	0	22	0	0	29	0	0	0.474747	0
			4	26	0	0	25	0	29	0	0	31	0	0	0.495495	0
			5	28	0	0	32	0	24	0	0	29	0	0	0.460177	0
			6	27	0	0	27	0	29	0	0	25	0	0	0.518519	0
			7	23	0	0	24	0	20	0	0	23	0	0	0.477778	0
			8	25	0	0	22	0	20	0	0	19	0	0	0.523256	0
			9	30	0	0	25	0	32	0	0	32	0	0	0.521008	0
			10	25	0	0	28	0	29	0	0	30	0	0	0.482143	0
			11	22	0	0	23	0	27	0	0	24	0	0	0.510417	0
			12	25	0	0	28	0	23	0	0	25	0	0	0.475248	0
			13	30	0	0	24	0	23	0	0	31	0	0	0.490741	0
			14	25	0	0	27	0	31	0	0	32	0	0	0.486957	0
			15	24	0	0	23	0	28	0	0	23	0	0	0.530612	0
			16	19	0	0	26	0	24	0	0	24	0	0	0.462366	0
			17	24	0	0	22	0	30	0	0	22	0	0	0.55102	0
			18	31	0	0	31	0	25	0	0	24	0	0	0.504505	0
			19	30	0	0	29	0	32	0	0	25	0	0	0.534483	0
			20	22	0	0	25	0	24	0	0	24	0	0	0.484211	0
													Average =	0	0.50076	0
													St Dev =	0	0.025608	0
			cross	♀w[U6b-GDe]/w+ X ♂trunk-Cas9/trunk-Cas9										Somatic	Transmission
				G1♀ progeny					G1 ♂ progeny					white	GDe	w-
				TW	Tw	Tm	tW	tw	TW	Tw	Tm	tW	tw	mosaicism	rate	rate
			1	22	0	0	25	0	23	0	0	22	0	0	0.48913	0
			2	25	0	0	27	0	28	0	0	28	0	0	0.490741	0
			3	26	0	0	26	0	32	0	0	25	0	0	0.53211	0
			4	21	0	0	22	0	17	0	0	22	0	0	0.463415	0
			5	28	0	0	34	0	25	0	0	28	0	0	0.46087	0
			6	27	0	0	26	0	28	0	0	21	0	0	0.539216	0
			7	24	0	0	23	0	21	0	0	28	0	0	0.46875	0
			8	27	0	0	24	0	28	0	0	25	0	0	0.528846	0
			9	29	0	0	28	0	28	0	0	34	0	0	0.478992	0
			10	21	0	0	29	0	28	0	0	27	0	0	0.466667	0
			11	20	0	0	28	0	26	0	0	25	0	0	0.464646	0
			12	17	0	0	22	0	20	0	0	25	0	0	0.440476	0
			13	25	0	0	24	0	28	0	0	21	0	0	0.540816	0
			14	31	0	0	32	0	30	0	0	34	0	0	0.480315	0
			15	22	0	0	25	0	21	0	0	23	0	0	0.472527	0
			16	29	0	0	33	0	29	0	0	29	0	0	0.483333	0
			17	32	0	0	24	0	28	0	0	28	0	0	0.535714	0
			18	26	0	0	21	0	28	0	0	29	0	0	0.519231	0
			19	27	0	0	20	0	22	0	0	28	0	0	0.505155	0
			20	25	0	0	31	0	29	0	0	26	0	0	0.486486	0
													Average =	0	0.492372	0
													St Dev =	0	0.0304123	0
			cross	♀w[U6b-GDe]/w+ X ♂nup50-Cas9/nup50-Cas9										Somatic	Transmission
				G1♀ progeny					G1 ♂ progeny					white	GDe	w-
				TW	Tw	Tm	tW	tw	TW	Tw	Tm	tW	tw	mosaicism	rate	rate
			1	13	0	13	24	0	16	0	13	29	0	0.472727	0.509259	0
			2	9	0	10	22	0	8	0	12	20	0	0.564103	0.481481	0
			3	11	0	11	31	0	15	0	10	28	0	0.446809	0.443396	0
			4	17	0	13	27	0	16	0	14	24	0	0.45	0.540541	0
			5	13	0	12	21	0	9	0	14	23	0	0.541667	0.521739	0
			6	10	0	16	30	0	12	0	15	28	0	0.584906	0.477477	0
			7	12	0	8	25	0	16	0	12	29	0	0.416667	0.470588	0
			8	14	0	6	19	0	13	0	10	23	0	0.372093	0.505882	0
			9	12	0	15	32	0	11	0	12	29	0	0.54	0.45045	0
			10	13	0	14	20	0	10	0	9	28	0	0.5	0.489362	0
			11	15	0	11	28	0	11	0	16	27	0	0.509434	0.490741	0
			12	16	0	12	29	0	16	0	12	33	0	0.428571	0.474576	0
			13	11	0	13	26	0	11	0	12	23	0	0.531915	0.489583	0
			14	9	0	12	27	0	11	0	10	23	0	0.52381	0.456522	0
			15	12	0	14	21	0	14	0	17	23	0	0.54386	0.564356	0
			16	13	0	13	28	0	10	0	17	27	0	0.566038	0.490741	0
			17	15	0	15	23	0	18	0	9	28	0	0.421053	0.527778	0
			18	18	0	10	22	0	16	0	11	21	0	0.381818	0.561224	0
			19	19	0	11	36	0	18	0	14	30	0	0.403226	0.484375	0
			20	10	0	13	21	0	7	0	13	30	0	0.604651	0.457447	0
													Average =	0.490167	0.494376	0
													St Dev =	0.0709619	0.0345077	0
			cross	♀w[U6b-GDe]/w+ X ♂ubiq-Cas9/ubiq-Cas9										Somatic	Transmission
				G1♀ progeny					G1 ♂ progeny					white	GDe	w-
				TW	Tw	Tm	tW	tw	TW	Tw	Tm	tW	tw	mosaicism	rate	rate
			1	25	0	0	23	0	30	0	0	25	0	0	0.533981	0
			2	23	0	0	22	0	24	0	0	21	0	0	0.522222	0
			3	22	0	0	15	0	22	0	0	20	0	0	0.556962	0
			4	21	0	0	21	0	17	0	0	23	0	0	0.463415	0
			5	33	0	0	30	0	28	0	0	36	0	0	0.480315	0
			6	26	0	0	24	0	30	0	0	20	0	0	0.56	0
			7	23	0	0	25	0	20	0	0	27	0	0	0.452632	0
			8	26	0	0	31	0	28	0	0	24	0	0	0.495413	0
			9	22	0	0	26	0	26	0	0	25	0	0	0.484848	0
			10	24	0	0	26	0	25	0	0	30	0	0	0.466667	0
			11	27	0	0	22	0	26	0	0	24	0	0	0.535354	0
			12	21	0	0	20	0	27	0	0	22	0	0	0.533333	0
			13	28	0	0	28	0	27	0	0	24	0	0	0.514019	0
			14	25	0	0	30	0	31	0	0	27	0	0	0.495575	0
			15	27	0	0	31	0	26	0	0	28	0	0	0.473214	0
			16	24	0	0	25	0	25	0	0	22	0	0	0.510417	0
			17	31	0	0	25	0	28	0	0	30	0	0	0.517544	0
			18	30	0	0	23	0	28	0	0	26	0	0	0.542056	0
			19	22	0	0	23	0	31	0	0	25	0	0	0.524752	0
			20	21	0	0	17	0	16	0	0	16	0	0	0.528571	0
													Average =	0	0.509564	0
													St Dev =	0	0.0315425	0

## Sheet: Supplementary File 4c
Legend:			Supplementary File 4c. Eye phenotypes in G2 progeny from ♀w[U6b-GDe]/w+; Cas9/+ with Maternal Cas9 X ♂w+/w+ (wt).
Phenotype	code
tdTomato+	T			cross	♀w[U6b-GDe]/w+; 4nitro-Cas9/+ X ♂w+/w+										Somatic	Transmission
tdTomato-	t				G2 ♀ progeny					G2 ♂ progeny					white	GDe	w-
Black eyes	W				TW	Tw	Tm	tW	tw	TW	Tw	Tm	tW	tw	mosaicism	rate	rate
Mosaic eyes	m		♀	1	22	0	6	22	0	27	0	6	27	0	0.196721	0.554545	0
White eyes	w		♀	2	16	0	6	23	0	13	0	5	18	0	0.275	0.493827	0
			♀	3	15	0	4	14	0	14	0	5	19	0	0.236842	0.535211	0
			♀	4	21	0	6	16	0	17	0	9	23	0	0.283019	0.576087	0
			♀	5	11	0	5	24	0	15	0	4	17	0	0.257143	0.460526	0
			♀	6	13	0	4	22	0	17	0	9	21	0	0.302326	0.5	0
			♀	7	10	0	6	27	0	12	0	6	25	0	0.352941	0.395349	0
			♀	8	25	0	6	16	0	28	0	5	20	0	0.171875	0.64	0
			♀	9	24	0	8	30	0	19	0	7	26	0	0.258621	0.508772	0
			♀	10	26	0	5	24	0	17	0	8	28	0	0.232143	0.518519	0
			♀	11	17	0	5	20	0	18	0	7	17	0	0.255319	0.559524	0
			♀	12	21	0	4	19	0	18	0	5	26	0	0.1875	0.516129	0
			♀	13	20	0	5	25	0	24	0	6	32	0	0.2	0.491071	0
			♀	14	15	0	4	22	0	17	0	3	17	0	0.179487	0.5	0
			♀	15	18	0	4	16	0	18	0	6	20	0	0.217391	0.560976	0
			♀	16	12	0	7	20	0	15	0	3	24	0	0.27027	0.45679	0
			♀	17	25	0	4	27	0	21	0	5	22	0	0.163636	0.528846	0
			♀	18	22	0	10	22	0	15	0	9	28	0	0.339286	0.528302	0
			♀	19	20	0	8	25	0	25	0	7	16	0	0.25	0.594059	0
			♀	20	20	0	7	21	0	19	0	5	32	0	0.235294	0.490385	0
														Average =	0.243241	0.520446	0
														St Dev =	0.0524271	0.0534358	0
				cross	♀w[U6b-GDe]/w+; trunk-Cas9/+ X ♂w+/w+										Somatic	Transmission
					G2 ♀ progeny					G2 ♂ progeny					white	GDe	w-
					TW	Tw	Tm	tW	tw	TW	Tw	Tm	tW	tw	mosaicism	rate	rate
			♀	1	5	0	21	21	0	6	0	23	17	0	0.8	0.591398	0
			♀	2	2	0	19	19	0	4	0	18	19	0	0.860465	0.530864	0
			♀	3	3	1	22	22	0	4	0	27	25	0	0.877193	0.548077	0.00970874
			♀	4	7	0	22	25	0	3	0	20	23	0	0.807692	0.52	0
			♀	5	1	0	24	25	0	5	2	23	31	0	0.890909	0.495495	0.0183486
			♀	6	3	0	17	21	0	5	0	24	31	0	0.836735	0.485149	0
			♀	7	5	0	31	33	0	4	0	28	30	0	0.867647	0.519084	0
			♀	8	2	0	35	31	1	2	0	31	27	1	0.942857	0.538462	0.015625
			♀	9	1	0	24	22	0	2	0	21	16	0	0.9375	0.55814	0
			♀	10	1	0	17	21	0	3	0	23	27	0	0.909091	0.478261	0
			♀	11	4	0	30	30	0	5	0	25	36	0	0.859375	0.492308	0
			♀	12	3	1	24	16	0	5	0	24	21	0	0.859649	0.606383	0.0107527
			♀	13	0	0	26	35	0	4	0	22	30	0	0.923077	0.444444	0
			♀	14	6	0	26	20	0	5	0	31	28	0	0.838235	0.586207	0
			♀	15	1	0	20	25	0	5	0	20	23	1	0.869565	0.484211	0.0106383
			♀	16	2	0	19	19	0	1	0	21	25	0	0.930233	0.494253	0
			♀	17	0	2	28	19	0	4	2	27	24	0	0.936508	0.59434	0.0392157
			♀	18	6	0	23	16	0	6	0	26	18	0	0.803279	0.642105	0
			♀	19	3	0	13	21	0	6	0	12	16	0	0.735294	0.478873	0
			♀	20	6	0	33	24	0	0	0	29	20	0	0.911765	0.607143	0
														Average =	0.869853	0.53476	0.00521445
														St Dev =	0.055396	0.0547658	0.00999454
				cross	♀w[U6b-GDe]/w+; nup50-Cas9/+ X ♂w+/w+										Somatic	Transmission
					G2 ♀ progeny					G2 ♂ progeny					white	GDe	w-
					TW	Tw	Tm	tW	tw	TW	Tw	Tm	tW	tw	mosaicism	rate	rate
			♀	1	0	0	33	5	0	0	0	39	7	0	1	0.857143	0
			♀	2	0	0	40	11	0	0	0	35	13	0	1	0.757576	0
			♀	3	0	0	31	8	0	0	0	25	6	0	1	0.8	0
			♀	4	0	0	43	5	0	0	1	47	4	0	1	0.91	0.010101
			♀	5	0	1	34	11	0	0	0	30	16	0	1	0.706522	0.010989
			♀	6	0	0	41	10	0	0	0	49	9	0	1	0.825688	0
			♀	7	0	0	32	6	1	0	0	38	5	0	1	0.853659	0.0123457
			♀	8	0	0	36	9	0	0	0	40	11	0	1	0.791667	0
			♀	9	0	1	40	11	0	0	0	36	9	0	1	0.793814	0.0104167
			♀	10	0	0	44	6	1	0	0	40	8	0	1	0.848485	0.0102041
			♀	11	0	0	42	6	0	0	0	36	10	1	1	0.821053	0.0106383
			♀	12	0	0	30	11	0	0	0	37	8	0	1	0.77907	0
			♀	13	0	0	29	10	1	0	1	36	10	0	1	0.758621	0.0235294
			♀	14	0	0	45	8	0	0	0	39	7	0	1	0.848485	0
			♀	15	0	2	42	7	0	0	0	38	16	0	1	0.780952	0.0194175
			♀	16	0	0	42	8	0	0	0	40	6	0	1	0.854167	0
			♀	17	0	0	40	9	0	0	1	44	11	0	1	0.809524	0.00961538
			♀	18	0	0	33	12	0	0	0	30	11	0	1	0.732558	0
			♀	19	0	0	31	13	0	0	0	39	10	0	1	0.752688	0
			♀	20	0	0	31	9	0	0	0	42	8	0	1	0.811111	0
					0	4	739	175	3	0	3	760	185	Average =	1	0.804639	0.00586285
														St Dev =	0	0.0495839	0.0073866
				cross	♀w[U6b-GDe]/w+; ubiq-Cas9/+ X ♂w+/w+										Somatic	Transmission
					G2 ♀ progeny					G2 ♂ progeny					white	GDe	w-
					TW	Tw	Tm	tW	tw	TW	Tw	Tm	tW	tw	mosaicism	rate	rate
			♀	1	0	0	50	12	0	0	1	44	10	1	1	0.805085	0.0172414
			♀	2	0	2	40	12	0	0	0	37	8	1	1	0.79	0.0309278
			♀	3	0	0	31	22	1	0	0	38	30	0	1	0.565574	0.00826446
			♀	4	0	1	32	24	0	0	1	26	20	0	1	0.576923	0.0196078
			♀	5	0	0	28	19	0	0	0	25	27	0	1	0.535354	0
			♀	6	0	0	28	16	1	0	0	34	12	1	1	0.673913	0.0222222
			♀	7	0	0	32	20	0	0	0	26	22	0	1	0.58	0
			♀	8	0	2	31	15	0	0	2	38	17	0	1	0.695238	0.039604
			♀	9	0	0	32	19	0	0	0	25	24	0	1	0.57	0
			♀	10	0	0	27	20	0	0	0	33	17	0	1	0.618557	0
			♀	11	0	1	29	22	1	0	0	33	21	0	1	0.588785	0.0190476
			♀	12	0	0	20	22	0	0	0	19	19	0	1	0.4875	0
			♀	13	0	0	26	24	0	0	1	31	17	0	1	0.585859	0.0102041
			♀	14	0	2	34	21	0	0	0	35	29	3	1	0.572581	0.0420168
			♀	15	0	1	39	8	0	0	0	42	7	0	1	0.845361	0.0104167
			♀	16	0	0	27	12	1	0	0	23	12	0	1	0.666667	0.0135135
			♀	17	0	0	23	10	0	0	0	28	13	0	1	0.689189	0
			♀	18	0	0	23	11	0	0	1	26	13	0	1	0.675676	0.0136986
			♀	19	0	2	39	13	0	0	0	36	13	0	1	0.747573	0.019802
			♀	20	0	0	32	6	0	0	0	41	7	1	1	0.83908	0.0116279
														Average =	1	0.655446	0.0139097
														St Dev =	0	0.105069	0.0128507

## Sheet: Supplementary File 4d
Legend:			Supplementary File 4d. Eye phenotypes in G2 progeny from ♂w[U6b-GDe]/w+; Cas9/+ with Maternal Cas9 X ♀w+/w+ (wt).
Phenotype	code
tdTomato+	T			cross	♂w[U6b-GDe]/w+; 4nitro-Cas9/+ X ♀w+/w+										Somatic	Transmission
tdTomato-	t				G2 ♀ progeny					G2 ♂ progeny					white	GDe	w-
Black eyes	W				TW	Tw	Tm	tW	tw	TW	Tw	Tm	tW	tw	mosaicism	rate	rate
Mosaic eyes	m		♂	1	0	0	0	52	0	57	0	0	0	0	0	0.522936	0
White eyes	w		♂	2	0	0	0	39	0	46	0	0	0	0	0	0.541176	0
			♂	3	0	0	0	46	0	53	0	0	0	0	0	0.535354	0
			♂	4	0	0	0	51	0	64	0	0	0	0	0	0.556522	0
			♂	5	0	0	0	56	0	57	0	0	0	0	0	0.504425	0
			♂	6	0	0	0	42	0	53	0	0	0	0	0	0.557895	0
			♂	7	0	0	0	56	0	44	0	0	0	0	0	0.44	0
			♂	8	0	0	0	45	0	47	0	0	0	0	0	0.51087	0
			♂	9	0	0	0	47	0	37	0	0	0	0	0	0.440476	0
			♂	10	1	0	0	45	0	52	0	0	0	0	0	0.540816	0
			♂	11	0	0	0	51	0	55	0	0	0	0	0	0.518868	0
			♂	12	0	0	0	49	0	62	0	0	0	0	0	0.558559	0
			♂	13	0	0	0	41	0	56	0	0	0	0	0	0.57732	0
			♂	14	0	0	0	52	0	63	0	0	0	0	0	0.547826	0
			♂	15	0	0	0	39	0	55	0	0	0	0	0	0.585106	0
			♂	16	0	0	0	47	0	44	0	0	0	0	0	0.483516	0
			♂	17	0	0	0	51	0	42	0	0	0	0	0	0.451613	0
			♂	18	0	0	0	54	0	59	0	0	0	0	0	0.522124	0
			♂	19	0	0	0	45	0	64	0	0	0	0	0	0.587156	0
			♂	20	0	0	0	36	0	42	0	0	0	0	0	0.538462	0
														Average =	0	0.526051	0
														St Dev =	0	0.0440475	0
				cross	♂w[U6b-GDe]/w+; trunk-Cas9/+ X ♀w+/w+										Somatic	Transmission
					G2 ♀ progeny					G2 ♂ progeny					white	GDe	w-
					TW	Tw	Tm	tW	tw	TW	Tw	Tm	tW	tw	mosaicism	rate	rate
			♂	1	0	0	0	46	0	56	0	0	0	0	0	0.54902	0
			♂	2	0	0	0	41	0	54	0	0	0	0	0	0.568421	0
			♂	3	0	0	0	49	0	64	0	0	0	0	0	0.566372	0
			♂	4	0	0	0	46	0	67	0	0	0	0	0	0.59292	0
			♂	5	0	0	0	39	0	43	0	0	0	0	0	0.52439	0
			♂	6	0	0	0	36	0	54	0	0	0	0	0	0.6	0
			♂	7	0	0	0	33	0	44	0	0	1	0	0	0.564103	0
			♂	8	0	0	0	54	0	41	0	0	0	0	0	0.431579	0
			♂	9	0	0	0	53	0	54	0	0	0	0	0	0.504673	0
			♂	10	1	0	0	39	0	46	0	0	0	0	0	0.546512	0
			♂	11	0	0	0	58	0	52	0	0	0	0	0	0.472727	0
			♂	12	0	0	0	26	0	27	0	0	0	0	0	0.509434	0
			♂	13	0	0	0	36	0	38	0	0	0	0	0	0.513514	0
			♂	14	0	0	0	42	0	53	0	0	1	0	0	0.552083	0
			♂	15	0	0	0	46	0	53	0	0	0	0	0	0.535354	0
			♂	16	0	0	0	36	0	40	0	0	0	0	0	0.526316	0
			♂	17	0	0	0	44	0	51	0	0	0	0	0	0.536842	0
			♂	18	0	0	0	49	0	57	0	0	0	0	0	0.537736	0
			♂	19	0	0	0	35	0	34	0	0	0	0	0	0.492754	0
			♂	20	0	0	0	28	0	33	0	0	0	0	0	0.540984	0
														Average =	0	0.533287	0
														St Dev =	0	0.0395491	0
				cross	♂w[U6b-GDe]/w+; nup50-Cas9/+ X ♀w+/w+										Somatic	Transmission
					G2 ♀ progeny					G2 ♂ progeny					white	GDe	w-
					TW	Tw	Tm	tW	tw	TW	Tw	Tm	tW	tw	mosaicism	rate	rate
			♂	1	0	0	0	39	0	35	0	27	0	0	0.435484	0.613861	0
			♂	2	0	0	0	42	0	33	0	37	0	0	0.528571	0.625	0
			♂	3	0	0	0	25	0	27	0	29	0	0	0.517857	0.691358	0
			♂	4	0	0	0	32	0	40	0	35	0	0	0.466667	0.700935	0
			♂	5	0	0	0	52	0	36	0	32	1	0	0.470588	0.561983	0
			♂	6	1	0	0	24	0	41	0	34	0	0	0.447368	0.76	0
			♂	7	0	0	0	41	0	39	0	44	0	0	0.53012	0.669355	0
			♂	8	0	0	0	30	0	29	0	25	0	0	0.462963	0.642857	0
			♂	9	0	0	0	28	0	25	0	31	0	0	0.553571	0.666667	0
			♂	10	1	0	0	36	0	33	0	42	0	0	0.552632	0.678571	0
			♂	11	0	0	0	29	0	36	0	31	0	0	0.462687	0.697917	0
			♂	12	1	0	0	36	0	35	0	38	0	0	0.513514	0.672727	0
			♂	13	0	0	0	44	0	40	0	45	0	0	0.529412	0.658915	0
			♂	14	0	0	0	37	0	25	0	27	0	0	0.519231	0.58427	0
			♂	15	0	0	0	28	0	29	0	36	0	0	0.553846	0.698925	0
			♂	16	0	0	0	31	0	38	0	41	0	0	0.518987	0.718182	0
			♂	17	0	0	0	18	0	34	0	34	0	0	0.5	0.790698	0
			♂	18	0	0	0	42	0	33	0	36	0	0	0.521739	0.621622	0
			♂	19	0	0	0	36	0	32	0	40	0	0	0.555556	0.666667	0
			♂	20	0	0	0	35	0	29	0	37	0	0	0.560606	0.653465	0
														Average =	0.51007	0.668699	0
														St Dev =	0.0392271	0.054171	0
				cross	♂w[U6b-GDe]/w+; ubiq-Cas9/+ X ♀w+/w+										Somatic	Transmission
					G2 ♀ progeny					G2 ♂ progeny					white	GDe	w-
					TW	Tw	Tm	tW	tw	TW	Tw	Tm	tW	tw	mosaicism	rate	rate
			♂	1	0	0	0	40	0	44	0	0	0	0	0	0.52381	0
			♂	2	0	0	0	41	0	38	0	0	0	0	0	0.481013	0
			♂	3	0	0	0	51	0	51	0	0	0	0	0	0.5	0
			♂	4	0	0	0	50	0	45	0	0	0	0	0	0.473684	0
			♂	5	0	0	0	56	0	58	0	0	0	0	0	0.508772	0
			♂	6	0	0	0	52	0	60	0	0	2	0	0	0.526316	0
			♂	7	0	0	0	51	0	46	0	0	0	0	0	0.474227	0
			♂	8	0	0	0	36	0	63	0	0	0	0	0	0.636364	0
			♂	9	0	0	0	44	0	49	0	0	0	0	0	0.526882	0
			♂	10	0	0	0	41	0	47	0	0	0	0	0	0.534091	0
			♂	11	0	0	0	41	0	68	0	0	0	0	0	0.623853	0
			♂	12	1	0	0	44	0	51	0	0	0	0	0	0.541667	0
			♂	13	0	0	0	43	0	54	0	0	0	0	0	0.556701	0
			♂	14	0	0	0	20	0	72	0	0	0	0	0	0.782609	0
			♂	15	0	0	0	58	0	51	0	0	0	0	0	0.46789	0
			♂	16	0	0	0	59	0	54	0	0	0	0	0	0.477876	0
			♂	17	0	0	0	27	0	67	0	0	0	0	0	0.712766	0
			♂	18	0	0	0	67	0	59	0	0	0	0	0	0.468254	0
			♂	19	0	0	0	28	0	49	0	0	0	0	0	0.636364	0
			♂	20	0	0	0	38	0	45	0	0	0	0	0	0.542169	0
														Average =	0	0.549765	0
														St Dev =	0	0.0865512	0

## Sheet: Supplementary File 4e
Legend:			Supplementary File 4e. Eye phenotypes in G2 progeny from ♀w[U6b-GDe]/w+; Cas9/+ with Paternal Cas9 X ♂w+/w+ (wt).
Phenotype	code
tdTomato+	T			cross	♀w[U6b-GDe]/w+; 4nitro-Cas9/+ X ♂w+/w+										Somatic	Transmission
tdTomato-	t				G2 ♀ progeny					G2 ♂ progeny					white	GDe	w-
Black eyes	W				TW	Tw	Tm	tW	tw	TW	Tw	Tm	tW	tw	mosaicism	rate	rate
Mosaic eyes	m		♀	1	16	0	4	25	0	14	0	4	24	0	0.210526	0.436782	0
White eyes	w		♀	2	20	0	2	21	0	18	0	4	24	0	0.136364	0.494382	0
			♀	3	22	0	4	24	0	20	0	6	22	0	0.192308	0.530612	0
			♀	4	23	0	6	28	0	21	0	5	25	0	0.2	0.509259	0
			♀	5	20	0	6	13	0	24	0	3	16	0	0.169811	0.646341	0
			♀	6	23	0	5	25	0	27	0	8	29	0	0.206349	0.538462	0
			♀	7	24	0	5	30	0	21	0	6	28	0	0.196429	0.491228	0
			♀	8	22	0	4	21	0	16	0	6	23	0	0.208333	0.521739	0
			♀	9	19	0	6	25	0	25	0	7	29	0	0.22807	0.513514	0
			♀	10	25	0	7	22	0	28	0	3	17	0	0.15873	0.617647	0
			♀	11	19	0	3	17	0	18	0	5	24	0	0.177778	0.523256	0
			♀	12	21	0	7	20	0	20	0	4	24	0	0.211538	0.541667	0
			♀	13	22	0	7	23	0	19	0	3	26	0	0.196078	0.51	0
			♀	14	30	0	5	26	0	26	0	5	27	0	0.151515	0.554622	0
			♀	15	16	0	5	24	0	20	0	6	21	0	0.234043	0.51087	0
			♀	16	21	0	6	27	0	24	0	6	23	0	0.210526	0.53271	0
			♀	17	23	0	5	16	0	16	0	2	20	0	0.152174	0.560976	0
			♀	18	20	0	4	23	0	24	0	7	28	0	0.2	0.518868	0
			♀	19	17	0	4	21	0	20	0	5	24	0	0.195652	0.505495	0
			♀	20	19	0	6	17	0	20	0	5	21	0	0.22	0.568182	0
														Average =	0.192811	0.53133	0
														St Dev =	0.0268329	0.0448322	0
				cross	♀w[U6b-GDe]/w+; trunk-Cas9/+ X ♂w+/w+										Somatic	Transmission
					G2 ♀ progeny					G2 ♂ progeny					white	GDe	w-
					TW	Tw	Tm	tW	tw	TW	Tw	Tm	tW	tw	mosaicism	rate	rate
			♀	1	4	0	25	33	0	6	0	27	25	0	0.83871	0.516667	0
			♀	2	2	0	27	21	0	1	0	27	25	0	0.947368	0.553398	0
			♀	3	5	0	17	21	0	8	0	16	18	0	0.717391	0.541176	0
			♀	4	5	0	23	25	0	3	0	22	30	0	0.849057	0.490741	0
			♀	5	0	0	24	25	0	2	0	20	16	0	0.956522	0.528736	0
			♀	6	1	0	25	20	0	2	0	30	27	0	0.948276	0.552381	0
			♀	7	5	1	19	19	0	9	0	17	23	0	0.72549	0.548387	0.0108696
			♀	8	6	0	17	18	0	4	0	16	17	0	0.767442	0.551282	0
			♀	9	3	0	33	25	0	4	1	24	22	0	0.892308	0.580357	0.00900901
			♀	10	5	0	27	23	0	7	0	24	29	0	0.809524	0.547826	0
			♀	11	7	0	20	25	0	5	0	17	20	0	0.755102	0.521277	0
			♀	12	1	0	23	26	0	2	0	27	16	0	0.943396	0.557895	0
			♀	13	4	0	18	17	0	3	0	22	20	0	0.851064	0.559524	0
			♀	14	10	0	21	20	0	8	0	24	22	0	0.714286	0.6	0
			♀	15	3	0	20	14	1	4	0	16	17	0	0.837209	0.573333	0.0135135
			♀	16	2	0	21	23	0	5	0	26	29	0	0.87037	0.509434	0
			♀	17	5	0	21	26	0	4	0	22	25	0	0.826923	0.504854	0
			♀	18	3	0	17	21	0	7	0	21	23	0	0.791667	0.521739	0
			♀	19	4	0	23	24	0	2	0	24	21	0	0.886792	0.540816	0
			♀	20	4	0	25	18	0	6	0	27	23	0	0.83871	0.601942	0
														Average =	0.83838	0.545088	0.0016696
														St Dev =	0.0772517	0.0298287	0.00414331
				cross	♀w[U6b-GDe]/w+; nup50-Cas9/+ X ♂w+/w+										Somatic	Transmission
					G2 ♀ progeny					G2 ♂ progeny					white	GDe	w-
					TW	Tw	Tm	tW	tw	TW	Tw	Tm	tW	tw	mosaicism	rate	rate
			♀	1	0	0	44	5	0	0	0	38	4	0	1	0.901099	0
			♀	2	0	0	41	19	0	0	0	52	19	0	1	0.709924	0
			♀	3	0	0	40	2	0	0	0	43	4	0	1	0.932584	0
			♀	4	0	1	32	10	0	0	1	29	13	0	1	0.732558	0.0238095
			♀	5	0	0	29	6	0	0	0	37	9	0	1	0.814815	0
			♀	6	0	0	45	4	0	0	0	35	5	0	1	0.898876	0
			♀	7	0	0	27	14	0	0	0	33	13	0	1	0.689655	0
			♀	8	0	0	45	8	0	0	0	53	6	0	1	0.875	0
			♀	9	0	0	34	7	0	0	0	33	7	0	1	0.82716	0
			♀	10	0	0	33	5	0	0	0	35	4	0	1	0.883117	0
			♀	11	0	0	46	6	0	0	0	48	5	0	1	0.895238	0
			♀	12	0	0	47	6	0	0	2	42	8	0	1	0.866667	0.0194175
			♀	13	0	0	30	8	0	0	0	27	11	0	1	0.75	0
			♀	14	0	0	35	15	0	0	0	36	16	0	1	0.696078	0
			♀	15	0	0	35	8	0	0	0	41	7	0	1	0.835165	0
			♀	16	0	0	36	12	0	0	0	35	17	0	1	0.71	0
			♀	17	0	0	42	9	0	0	0	44	7	0	1	0.843137	0
			♀	18	0	0	41	8	0	0	0	44	6	0	1	0.858586	0
			♀	19	0	1	44	2	0	0	0	51	4	0	1	0.941176	0.00990099
			♀	20	0	0	29	8	0	0	0	31	10	0	1	0.769231	0
					0	2	755	162	0	0	3	787	175	Average =	1	0.821503	0.0026564
														St Dev =	0	0.0823914	0.00688565
				cross	♀w[U6-GDe]/w+; ubiq-Cas9/+ X ♂w+/w+										Somatic	Transmission
					G2 ♀ progeny					G2 ♂ progeny					white	GDe	w-
					TW	Tw	Tm	tW	tw	TW	Tw	Tm	tW	tw	mosaicism	rate	rate
			♀	1	0	0	32	7	0	0	1	35	8	0	1	0.819277	0.0121951
			♀	2	0	2	35	13	0	0	0	42	17	0	1	0.724771	0.0186916
			♀	3	0	0	30	17	0	0	0	23	15	1	1	0.616279	0.0117647
			♀	4	0	0	33	14	0	0	1	26	11	0	1	0.705882	0.0119048
			♀	5	0	1	37	11	1	0	0	48	14	0	1	0.767857	0.0181818
			♀	6	0	0	27	18	1	0	0	26	22	1	1	0.557895	0.0215054
			♀	7	0	0	29	21	0	0	0	37	17	0	1	0.634615	0
			♀	8	0	0	26	20	0	0	0	21	17	0	1	0.559524	0
			♀	9	0	0	27	21	0	0	0	26	26	0	1	0.53	0
			♀	10	0	0	33	19	0	0	0	29	17	0	1	0.632653	0
			♀	11	0	1	29	15	0	0	0	36	19	0	1	0.66	0.010101
			♀	12	0	0	32	10	0	0	0	40	13	0	1	0.757895	0
			♀	13	0	0	31	17	1	0	0	25	16	0	1	0.622222	0.011236
			♀	14	0	2	39	14	1	0	0	34	11	0	1	0.742574	0.0306122
			♀	15	0	0	25	13	0	0	2	32	9	0	1	0.728395	0.0253165
			♀	16	0	1	24	22	0	0	0	32	25	0	1	0.548077	0.00970874
			♀	17	0	0	31	21	0	0	0	33	18	0	1	0.621359	0
			♀	18	0	0	37	23	0	0	1	38	19	0	1	0.644068	0.00854701
			♀	19	0	0	33	15	1	0	0	32	14	1	1	0.677083	0.0212766
			♀	20	0	0	23	7	0	0	0	20	4	0	1	0.796296	0
														Average =	1	0.667336	0.0105521
														St Dev =	0	0.0854093	0.00965368

## Sheet: Supplementary File 4f
Legend:			Supplementary File 4f. Eye phenotypes in G2 progeny from ♂w[U6b-GDe]/w+; Cas9/+ with Paternal Cas9 X ♀w+/w+ (wt).
Phenotype	code
tdTomato+	T			cross	♂w[U6b-GDe]/w+; 4nitro-Cas9/+ X ♀w+/w+										Somatic	Transmission
tdTomato-	t				G2 ♀ progeny					G2 ♂ progeny					white	GDe	w-
Black eyes	W				TW	Tw	Tm	tW	tw	TW	Tw	Tm	tW	tw	mosaicism	rate	rate
Mosaic eyes	m		♂	1	55	0	0	0	0	0	0	0	47	0	0	0.539216	0
White eyes	w		♂	2	43	0	0	0	0	0	0	0	46	0	0	0.483146	0
			♂	3	37	0	0	0	0	0	0	0	46	0	0	0.445783	0
			♂	4	50	0	0	0	0	0	0	0	59	0	0	0.458716	0
			♂	5	42	0	0	0	0	0	0	0	51	0	0	0.451613	0
			♂	6	49	0	0	0	0	0	0	0	36	0	0	0.576471	0
			♂	7	55	0	0	0	0	0	0	0	47	0	0	0.539216	0
			♂	8	46	0	0	0	0	0	0	0	53	0	0	0.464646	0
			♂	9	42	0	0	0	0	0	0	0	54	0	0	0.4375	0
			♂	10	44	0	0	0	0	0	0	0	56	0	0	0.44	0
			♂	11	53	0	0	0	0	0	0	0	62	0	0	0.46087	0
			♂	12	51	0	0	0	0	0	0	0	56	0	0	0.476636	0
			♂	13	43	0	0	0	0	0	0	0	48	0	0	0.472527	0
			♂	14	52	0	0	0	0	0	0	0	61	0	0	0.460177	0
			♂	15	34	0	0	0	0	0	0	0	49	0	0	0.409639	0
			♂	16	52	0	0	0	0	0	0	0	47	0	0	0.525253	0
			♂	17	45	0	0	0	0	0	0	0	57	0	0	0.441176	0
			♂	18	42	0	0	0	0	0	0	0	61	0	0	0.407767	0
			♂	19	53	0	0	0	0	0	0	0	60	0	0	0.469027	0
			♂	20	41	0	0	0	0	0	0	0	58	0	0	0.414141	0
														Average =	0	0.468676	0
														St Dev =	0	0.0452151	0
				cross	♂w[U6b-GDe]/w+; trunk-Cas9/+ X ♀w+/w+										Somatic	Transmission
					G2 ♀ progeny					G2 ♂ progeny					white	GDe	w-
					TW	Tw	Tm	tW	tw	TW	Tw	Tm	tW	tw	mosaicism	rate	rate
			♂	1	46	0	0	0	0	0	0	0	44	0	0	0.511111	0
			♂	2	43	0	0	0	0	0	0	0	57	0	0	0.43	0
			♂	3	35	0	0	1	0	1	0	0	53	0	0	0.4	0
			♂	4	55	0	0	0	0	0	0	0	59	0	0	0.482456	0
			♂	5	51	0	0	0	0	0	0	0	56	0	0	0.476636	0
			♂	6	54	0	0	0	0	0	0	0	45	0	0	0.545455	0
			♂	7	45	0	0	0	0	0	0	0	56	0	0	0.445545	0
			♂	8	47	0	0	0	0	0	0	0	44	0	0	0.516484	0
			♂	9	56	0	0	0	0	0	0	0	63	0	0	0.470588	0
			♂	10	62	0	0	0	0	0	0	0	67	0	0	0.48062	0
			♂	11	61	0	0	0	0	0	0	0	56	0	0	0.521368	0
			♂	12	52	0	0	0	0	2	0	0	57	0	0	0.486486	0
			♂	13	52	0	0	0	0	0	0	0	55	0	0	0.485981	0
			♂	14	45	0	0	0	0	0	0	0	56	0	0	0.445545	0
			♂	15	46	0	0	0	0	0	0	0	47	0	0	0.494624	0
			♂	16	53	0	0	0	0	0	0	0	58	0	0	0.477477	0
			♂	17	46	0	0	0	0	0	0	0	44	0	0	0.511111	0
			♂	18	43	0	0	0	0	0	0	0	55	0	0	0.438776	0
			♂	19	45	0	0	0	0	0	0	0	62	0	0	0.420561	0
			♂	20	33	0	0	0	0	0	0	0	45	0	0	0.423077	0
														Average =	0	0.473195	0
														St Dev =	0	0.0387215	0
				cross	♂w[U6b-GDe]/w+; nup50-Cas9/+ X ♀w+/w+										Somatic	Transmission
					G2 ♀ progeny					G2 ♂ progeny					white	GDe	w-
					TW	Tw	Tm	tW	tw	TW	Tw	Tm	tW	tw	mosaicism	rate	rate
			♂	1	23	0	20	0	0	0	0	0	38	0	0.509804	0.6375	0
			♂	2	31	0	35	0	0	0	0	0	45	0	0.45614	0.655172	0
			♂	3	25	0	19	0	0	0	0	0	50	0	0.523077	0.625	0
			♂	4	31	0	31	0	0	1	0	0	48	0	0.468085	0.734375	0
			♂	5	32	0	33	1	0	0	0	0	51	0	0.460526	0.703704	0
			♂	6	21	0	28	0	0	1	0	0	35	0	0.525641	0.614173	0
			♂	7	18	0	24	0	0	0	0	0	41	0	0.480769	0.732394	0
			♂	8	26	0	15	0	0	0	0	0	33	0	0.470588	0.708333	0
			♂	9	26	0	24	0	0	0	0	0	38	0	0.473684	0.721519	0
			♂	10	25	0	33	0	0	0	0	0	54	0	0.425926	0.545455	0
			♂	11	33	0	23	0	0	0	0	0	49	0	0.517647	0.602837	0
			♂	12	32	0	35	0	0	0	0	0	45	0	0.428571	0.608696	0
			♂	13	22	0	27	0	0	0	0	0	38	0	0.55102	0.563218	0
			♂	14	31	0	21	0	0	0	0	0	68	0	0.561644	0.675926	0
			♂	15	17	0	22	1	0	1	0	0	41	0	0.529412	0.708333	0
			♂	16	28	0	22	0	0	0	0	0	42	0	0.431034	0.690476	0
			♂	17	22	0	17	0	0	0	0	0	37	0	0.547619	0.6	0
			♂	18	25	0	25	0	0	0	0	0	37	0	0.47619	0.6	0
			♂	19	36	0	25	0	0	0	0	0	50	0	0.432836	0.603604	0
			♂	20	21	0	29	0	0	0	0	0	46	0	0.513158	0.752475	0
														Average =	0.489169	0.65416	0
														St Dev =	0.0434141	0.0619055	0
				cross	♂w[U6b-GDe]/w+; ubiq-Cas9/+ X ♀w+/w+										Somatic	Transmission
					G2 ♀ progeny					G2 ♂ progeny					white	GDe	w-
					TW	Tw	Tm	tW	tw	TW	Tw	Tm	tW	tw	mosaicism	rate	rate
			♂	1	53	0	0	0	0	0	0	0	45	0	0	0.540816	0
			♂	2	56	0	0	0	0	0	0	0	47	0	0	0.543689	0
			♂	3	42	0	0	0	0	1	0	0	35	0	0	0.551282	0
			♂	4	61	0	0	0	0	0	0	0	64	0	0	0.488	0
			♂	5	53	0	0	0	0	0	0	0	51	0	0	0.509615	0
			♂	6	47	0	0	3	0	0	0	0	49	0	0	0.474747	0
			♂	7	48	0	0	0	0	0	0	0	42	0	0	0.533333	0
			♂	8	54	0	0	0	0	0	0	0	46	0	0	0.54	0
			♂	9	65	0	0	0	0	0	0	0	43	0	0	0.601852	0
			♂	10	58	0	0	0	0	0	0	0	44	0	0	0.568627	0
			♂	11	66	0	0	0	0	0	0	0	53	0	0	0.554622	0
			♂	12	52	0	0	0	0	0	0	0	38	0	0	0.577778	0
			♂	13	44	0	0	0	0	0	0	0	34	0	0	0.564103	0
			♂	14	61	0	0	0	0	2	0	0	35	0	0	0.642857	0
			♂	15	63	0	0	0	0	0	0	0	56	0	0	0.529412	0
			♂	16	56	0	0	0	0	0	0	0	61	0	0	0.478632	0
			♂	17	54	0	0	1	0	0	0	0	34	0	0	0.606742	0
			♂	18	55	0	0	0	0	0	0	0	41	0	0	0.572917	0
			♂	19	62	0	0	0	0	0	0	0	42	0	0	0.596154	0
			♂	20	56	0	0	0	0	0	0	0	33	0	0	0.629213	0
														Average =	0	0.55522	0
														St Dev =	0	0.0466867	0
