# Supplementary material for: Development of a confinable gene drive system in the human disease vector Aedes aegypti
Source: eLife. 2020 Jan 21;9:e51701. doi: 10.7554/eLife.51701 (PMC6974361; doi:10.7554/eLife.51701)
Supplement: Supplementary file 1. [file elife-51701-supp1.xlsx]

## Sheet: Supplementary File 1
			Supplementary File 1. Frequency of white somatic knockout in G1 gRNA[w]/+; Cas9/+ trans-heterozygotes depends on U6 promoter driving gRNA[w] expression.
Legend:
Phenotype	code			G1 progeny of 10♂ w+/w+; U6-gRNA[w]-3'UTR, 3xP3-eGFP X 10♀ exu-Cas9,dsRed/exu-Cas9,dsRed
eGFP+	G			Replicate 1			Replicate 2			Replicate 3
eGFP–	g		Line	Gm	GR	Gm/GR	Gm	GR	Gm/GR	Gm	GR	Gm/GR	Average	St.Dev
Black eyes	W		U6a-gRNA[w], 3xP3-eGFP	21	127	16.5354	26	135	19.2593	16	82	19.5122	18.4356	1.65047
Mosaic eyes	m		U6b-gRNA[w], 3xP3-eGFP	72	93	77.4194	110	148	74.3243	75	104	72.1154	74.6197	2.66429
White eyes	w		U6c-gRNA[w], 3xP3-eGFP	105	116	90.5172	87	93	93.5484	81	84	96.4286	93.4981	2.95599
Cas9 marker dsRED	R		U6d-gRNA[w], 3xP3-eGFP	0	110	0	0	114	0	0	79	0	0	0
				G1 progeny of 10♂ w+/w+; U6-gRNA[w]-3'UTR, 3xP3-eGFP X 10♀ ubi-Cas9,dsRed/ubi-Cas9,dsRed
				Replicate 1			Replicate 2			Replicate 3
			Line	Gm	GR	Gm/GR	Gm	GR	Gm/GR	Gm	GR	Gm/GR	Average	St.Dev
			U6a-gRNA[w], 3xP3-eGFP	58	103	56.3107	37	99	37.3737	44	93	47.3118	46.9987	9.47235
			U6b-gRNA[w], 3xP3-eGFP	122	122	100	147	147	100	99	99	100	100	0
			U6c-gRNA[w] 3xP3-eGFP	87	87	100	125	125	100	104	104	100	100	0
			U6d-gRNA[w], 3xP3-eGFP	0	93	0	0	108	0	0	133	0	0	0
