# Supplementary material for: Development of a confinable gene drive system in the human disease vector Aedes aegypti
Source: eLife. 2020 Jan 21;9:e51701. doi: 10.7554/eLife.51701 (PMC6974361; doi:10.7554/eLife.51701)
Supplement: Supplementary file 2. [file elife-51701-supp2.xlsx]

## Sheet: Supplementary File 2
			Supplementary File 2. Genetic linkage of Gene Drive element (GDe) integrated at white locus and Nix (male dominant locus), raw data.
Legend:
Phenotype	code		♀w[U6a-GDe]/w+ X ♂ w+/w+									♂w[U6a-GDe]/w+ X ♀w+/w+									♂w[U6a-GDe]/w[U6a-GDe] X ♀w+/w+									♀w[U6a-GDe]/w[U6a-GDe] X ♂ +/+
tdTomato+	T			G1 ♀Progeny		G1 ♂Progeny		♀	♂	Joint			G1 ♀Progeny		G1 ♂Progeny		♀	♂	Joint			G1 ♀Progeny		G1 ♂Progeny		♀	♂	Joint			G1 ♀Progeny		G1 ♂Progeny		♀	♂	Joint
tdTomato-	t		Cross #	T	t	T	t					Cross #	T	t	T	t					Cross #	T	t	T	t					Cross #	T	t	T	t
			1	34	30	27	36	0.53125	0.428571	0.480315		1	47	0	0	51	1	0	0.479592		1	55	0	62	0	1	1	1		1	55	0	66	0	1	1	1
			2	27	28	34	27	0.490909	0.557377	0.525862		2	51	0	1	58	1	0.0169492	0.472727		2	65	0	70	0	1	1	1		2	60	0	53	0	1	1	1
			3	28	31	24	33	0.474576	0.421053	0.448276		3	61	0	0	54	1	0	0.530435		3	67	0	58	0	1	1	1		3	60	0	68	0	1	1	1
			4	25	28	22	25	0.471698	0.468085	0.47		4	51	0	0	53	1	0	0.490385		4	61	0	58	0	1	1	1		4	65	0	64	0	1	1	1
			5	24	29	31	32	0.45283	0.492063	0.474138		5	57	0	0	51	1	0	0.527778		5	57	0	59	0	1	1	1		5	74	0	67	0	1	1	1
			6	33	32	27	26	0.507692	0.509434	0.508475		6	44	0	0	47	1	0	0.483516		6	68	0	67	0	1	1	1		6	53	0	60	0	1	1	1
			7	29	27	31	26	0.517857	0.54386	0.530973		7	67	0	0	59	1	0	0.531746		7	67	0	60	0	1	1	1		7	57	0	59	0	1	1	1
			8	32	28	30	25	0.533333	0.545455	0.53913		8	55	0	0	57	1	0	0.491071		8	59	0	67	0	1	1	1		8	65	0	62	0	1	1	1
			9	20	31	23	21	0.392157	0.522727	0.452632		9	56	0	0	47	1	0	0.543689		9	61	0	58	0	1	1	1		9	54	0	45	0	1	1	1
			10	24	33	30	28	0.421053	0.517241	0.469565		10	54	0	0	61	1	0	0.469565		10	54	0	64	0	1	1	1		10	57	0	65	0	1	1	1
			11	24	22	28	27	0.521739	0.509091	0.514851		11	69	0	0	62	1	0	0.526718		11	66	0	59	0	1	1	1		11	50	0	58	0	1	1	1
			12	29	22	27	29	0.568627	0.482143	0.523364		12	63	0	0	54	1	0	0.538462		12	54	0	51	0	1	1	1		12	59	0	54	0	1	1	1
			13	31	35	25	29	0.469697	0.462963	0.466667						average	100	0.141243	50.714		13	68	0	57	0	1	1	1		13	68	0	61	0	1	1	1
			14	35	31	31	27	0.530303	0.534483	0.532258						st Dev	0	0.48928	2.81654		14	39	0	47	0	1	1	1		14	74	0	71	0	1	1	1
			15	33	29	28	24	0.532258	0.538462	0.535088											15	53	0	61	0	1	1	1		15	61	0	72	0	1	1	1
			16	30	30	26	27	0.5	0.490566	0.495575		13	0	49	56	0	0	1	0.533333		16	63	0	58	0	1	1	1		16	42	0	50	0	1	1	1
			17	27	27	31	36	0.5	0.462687	0.479339		14	0	61	54	0	0	1	0.469565		17	58	0	72	0	1	1	1		17	57	0	50	0	1	1	1
			18	25	27	28	29	0.480769	0.491228	0.486239		15	0	63	60	0	0	1	0.487805		18	44	0	48	0	1	1	1		18	59	0	58	0	1	1	1
			19	21	21	28	24	0.5	0.538462	0.521277		16	0	45	52	0	0	1	0.536082		19	55	0	50	0	1	1	1		19	59	0	56	0	1	1	1
			20	26	32	24	29	0.448276	0.45283	0.45045		17	2	61	65	0	0.031746	1	0.523438		20	66	0	53	0	1	1	1		20	64	0	72	0	1	1	1
							average	49.2251	49.8439	49.5224		18	0	47	53	0	0	1	0.53						average	100	100	100						average	100	100	100
							st Dev	4.22943	3.99054	3.10091		19	0	57	52	0	0	1	0.477064						st Dev	0	0	0						st Dev	0	0	0
												20	0	56	49	0	0	1	0.466667
																average	0.396825	100	50.2994
																st Dev	1.12239	0	3.0479
			♀w[U6b-GDe]/w+ X ♂w+/w+									♂w[U6b-GDe]/w+ X ♀w+/w+									♂w[U6b-GDe]/w[U6b-GDe] X ♀w+/w+									♀w[U6b-GDe]/w[U6b-GDe] X ♂ w+/w+
				G1 ♀Progeny		G1 ♂Progeny		♀	♂				G1 ♀Progeny		G1 ♂Progeny		♀	♂	Joint			G1 ♀Progeny		G1 ♂Progeny		♀	♂	Joint			G1 ♀Progeny		G1 ♂Progeny		♀	♂	Joint
			Cross #	T	t	T	t					Cross #	T	t	T	t					Cross #	T	t	T	t					Cross #	T	t	T	t
			1	26	29	24	26	0.472727	0.48	0.47619		1	49	0	0	47	1	0	0.510417		1	52	0	54	0	1	1	1		1	62	0	58	0	1	1	1
			2	22	21	26	25	0.511628	0.509804	0.510638		2	42	0	0	51	1	0	0.451613		2	45	0	50	0	1	1	1		2	56	0	60	0	1	1	1
			3	20	23	22	19	0.465116	0.536585	0.5		3	61	0	0	66	1	0	0.480315		3	57	0	59	0	1	1	1		3	45	0	52	0	1	1	1
			4	27	25	24	29	0.519231	0.45283	0.485714		4	55	0	0	52	1	0	0.514019		4	62	0	55	0	1	1	1		4	47	0	48	0	1	1	1
			5	32	29	30	32	0.52459	0.483871	0.504065		5	49	0	0	55	1	0	0.471154		5	53	0	58	0	1	1	1		5	52	0	52	0	1	1	1
			6	33	35	31	28	0.485294	0.525424	0.503937		6	44	0	0	47	1	0	0.483516		6	47	0	52	0	1	1	1		6	45	0	41	0	1	1	1
			7	23	29	25	33	0.442308	0.431034	0.436364		7	42	0	0	46	1	0	0.477273		7	51	0	50	0	1	1	1		7	37	0	42	0	1	1	1
			8	21	26	26	28	0.446809	0.481481	0.465347		8	51	0	0	55	1	0	0.481132		8	44	0	43	0	1	1	1		8	66	0	71	0	1	1	1
			9	26	30	30	28	0.464286	0.517241	0.491228		9	52	0	0	52	1	0	0.5		9	56	0	53	0	1	1	1		9	46	0	50	0	1	1	1
			10	32	29	27	29	0.52459	0.482143	0.504274		10	42	0	0	46	1	0	0.477273		10	50	0	55	0	1	1	1		10	52	0	56	0	1	1	1
			11	27	26	25	24	0.509434	0.510204	0.509804		11	46	0	0	44	1	0	0.511111		11	54	0	52	0	1	1	1		11	47	0	53	0	1	1	1
			12	20	24	21	21	0.454545	0.5	0.476744						average	100	0	48.7075		12	48	0	44	0	1	1	1		12	52	0	50	0	1	1	1
			13	33	32	33	30	0.507692	0.52381	0.515625						st Dev	0	0	0.0195256		13	62	0	65	0	1	1	1		13	62	0	55	0	1	1	1
			14	25	27	25	22	0.480769	0.531915	0.505051											14	54	0	48	0	1	1	1		14	43	0	51	0	1	1	1
			15	28	28	24	28	0.5	0.461538	0.481481		12	3	42	50	0	0.0666667	1	0.557895		15	56	0	58	0	1	1	1		15	53	0	57	0	1	1	1
			16	24	23	28	26	0.510638	0.518519	0.514851		13	0	53	48	0	0	1	0.475248		16	64	0	70	0	1	1	1		16	62	0	67	0	1	1	1
			17	23	30	31	27	0.433962	0.534483	0.486486		14	0	62	57	0	0	1	0.478992		17	51	0	52	0	1	1	1		17	55	0	46	0	1	1	1
			18	25	20	25	27	0.555556	0.480769	0.515464		15	0	51	53	0	0	1	0.509615		18	56	0	52	0	1	1	1		18	53	0	52	0	1	1	1
			19	26	28	22	24	0.481481	0.478261	0.48		16	1	47	51	2	0.0208333	0.962264	0.514851		19	47	0	48	0	1	1	1		19	51	0	50	0	1	1	1
			20	21	23	27	23	0.477273	0.54	0.510638		17	0	50	45	0	0	1	0.473684		20	53	0	47	0	1	1	1		20	46	0	52	0	1	1	1
							average	48.8396	49.8996	49.3695		18	0	43	39	0	0	1	0.47561						average	100	100	100						average	100	100	100
							st Dev	3.21476	3.06118	2.03545		19	2	54	60	0	0.0357143	1	0.534483						st Dev	0	0	0						st Dev	0	0	0
												20	0	56	55	0	0	1	0.495495
																average	1.36905	99.5807	50.1764
																st Dev	2.36303	1.25786	2.99742
			♀w[U6c-GDe]/w+ X ♂w+/w+									♂w[U6c-GDe]/w+ X ♀w+/w+									♂w[U6c-GDe]/w[U6b-GDe] X ♀w+/w+									♀w[U6c-GDe]/w[U6c-GDe] X ♂w+/w+
				G1 ♀Progeny		G1 ♂Progeny		♀	♂				G1 ♀Progeny		G1 ♂Progeny		♀	♂				G1 ♀Progeny		G1 ♂Progeny		♀	♂	Joint			G1 ♀Progeny		G1 ♂Progeny		♀	♂	Joint
			Cross #	T	t	T	t					Cross #	T	t	T	t					Cross #	T	t	T	t					Cross #	T	t	T	t
			1	22	21	21	26	0.511628	0.446809	0.477778		1	57	0	0	55	1	0	0.508929		1	57	0	61	0	1	1	1		1	62	0	57	0	1	1	1
			2	25	28	24	28	0.471698	0.461538	0.466667		2	54	0	0	60	1	0	0.473684		2	47	0	46	0	1	1	1		2	44	0	49	0	1	1	1
			3	20	24	26	23	0.454545	0.530612	0.494624		3	43	0	0	39	1	0	0.52439		3	55	0	58	0	1	1	1		3	53	0	61	0	1	1	1
			4	24	22	21	20	0.521739	0.512195	0.517241		4	55	0	0	61	1	0	0.474138		4	53	0	50	0	1	1	1		4	56	0	52	0	1	1	1
			5	27	27	27	31	0.5	0.465517	0.482143		5	58	3	1	56	0.95082	0.0175439	0.5		5	48	0	42	0	1	1	1		5	45	0	39	0	1	1	1
			6	28	25	29	31	0.528302	0.483333	0.504425		6	55	0	0	54	1	0	0.504587		6	51	0	57	0	1	1	1		6	37	0	35	0	1	1	1
			7	27	31	30	24	0.465517	0.555556	0.508929		7	47	0	0	53	1	0	0.47		7	46	0	41	0	1	1	1		7	42	0	47	0	1	1	1
			8	30	32	32	29	0.483871	0.52459	0.504065		8	45	0	0	48	1	0	0.483871		8	56	0	52	0	1	1	1		8	56	0	60	0	1	1	1
			9	24	26	28	27	0.48	0.509091	0.495238						average	99.3852	0.219298	49.245		9	62	0	65	0	1	1	1		9	66	0	61	0	1	1	1
			10	29	25	22	27	0.537037	0.44898	0.495146						st Dev	0.0173879	0.00620269	0.0198607		10	66	0	59	0	1	1	1		10	48	0	52	0	1	1	1
			11	22	21	26	25	0.511628	0.509804	0.510638											11	56	0	58	0	1	1	1		11	53	0	50	0	1	1	1
			12	24	21	26	26	0.533333	0.5	0.515464		9	0	50	52	0	0	1	0.509804		12	54	0	46	0	1	1	1		12	65	0	61	0	1	1	1
			13	25	30	22	26	0.454545	0.458333	0.456311		10	0	51	55	0	0	1	0.518868		13	53	0	52	0	1	1	1		13	56	0	62	0	1	1	1
			14	29	33	26	31	0.467742	0.45614	0.462185		11	2	48	45	0	0.04	1	0.494737		14	50	0	49	0	1	1	1		14	47	0	53	0	1	1	1
			15	34	29	37	34	0.539683	0.521127	0.529851		12	0	42	46	0	0	1	0.522727		15	71	0	66	0	1	1	1		15	55	0	59	0	1	1	1
			16	26	18	23	20	0.590909	0.534884	0.563218		13	2	47	50	0	0.0408163	1	0.525253		16	52	0	58	0	1	1	1		16	65	0	58	0	1	1	1
			17	28	27	27	28	0.509091	0.490909	0.5		14	0	52	53	0	0	1	0.504762		17	63	0	61	0	1	1	1		17	53	0	55	0	1	1	1
			18	20	25	25	18	0.444444	0.581395	0.511364		15	0	62	65	2	0	0.970149	0.503876		18	56	0	53	0	1	1	1		18	47	0	52	0	1	1	1
			19	27	30	25	28	0.473684	0.471698	0.472727		16	0	59	53	0	0	1	0.473214		19	46	0	57	0	1	1	1		19	56	0	47	0	1	1	1
			20	26	23	24	26	0.530612	0.48	0.505051		17	0	51	52	0	0	1	0.504854		20	56	0	60	0	1	1	1		20	51	0	55	0	1	1	1
							average	50.05	49.7126	49.8653		18	0	55	46	0	0	1	0.455446						average	100	100	100						average	100	100	100
							st Dev	3.7334	3.72762	2.49767		19	1	41	37	0	0.0238095	1	0.481013						st Dev	0	0	0						st Dev	0	0	0
												20	0	53	51	0	0	1	0.490385
																average	0.871882	99.7512	49.8745
																st Dev	1.62946	0.861717	2.09587
			♀w[U6d-GDe]/w+ X ♂w+/w									♂w[U6d-GDe]/w+ X ♀w+/w+									♂w[U6d-GDe]/w[U6d-GDe] X ♀w+/w+									♀w[U6d-GDe]/w[U6d-GDe] X ♂w+/w+
				G1 ♀Progeny		G1 ♂Progeny		♀	♂				G1 ♀Progeny		G1 ♂Progeny		♀	♂				G1 ♀Progeny		G1 ♂Progeny		♀	♂	Joint			G1 ♀Progeny		G1 ♂Progeny		♀	♂	Joint
			Cross #	T	t	T	t					Cross #	T	t	T	t					Cross #	T	t	T	t					Cross #	T	t	T	t
			1	26	28	29	33	0.481481	0.467742	0.474138		1	56	0	0	50	1	0	0.528302		1	45	0	42	0	1	1	1		1	59	0	63	0	1	1	1
			2	29	31	27	24	0.483333	0.529412	0.504505		2	45	0	0	52	1	0	0.463918		2	51	0	49	0	1	1	1		2	52	0	50	0	1	1	1
			3	21	26	20	23	0.446809	0.465116	0.455556		3	54	0	0	58	1	0	0.482143		3	63	0	69	0	1	1	1		3	47	0	55	0	1	1	1
			4	25	23	23	29	0.520833	0.442308	0.48		4	43	0	0	39	1	0	0.52439		4	53	0	57	0	1	1	1		4	41	0	36	0	1	1	1
			5	23	19	18	18	0.547619	0.5	0.525641		5	48	2	0	58	0.96	0	0.444444		5	55	0	51	0	1	1	1		5	53	0	55	0	1	1	1
			6	19	26	25	26	0.422222	0.490196	0.458333		6	56	0	0	53	1	0	0.513761		6	50	0	46	0	1	1	1		6	57	0	51	0	1	1	1
			7	25	30	27	30	0.454545	0.473684	0.464286		7	46	0	0	51	1	0	0.474227		7	54	0	57	0	1	1	1		7	47	0	53	0	1	1	1
			8	27	29	24	25	0.482143	0.489796	0.485714		8	47	0	0	44	1	0	0.516484		8	52	0	60	0	1	1	1		8	48	0	50	0	1	1	1
			9	31	27	31	33	0.534483	0.484375	0.508197		9	37	0	1	41	1	0.0238095	0.481013		9	51	0	46	0	1	1	1		9	56	0	51	0	1	1	1
			10	21	20	25	19	0.512195	0.568182	0.541176		10	52	0	0	55	1	0	0.485981		10	44	0	36	0	1	1	1		10	62	0	66	0	1	1	1
			11	25	28	24	28	0.471698	0.461538	0.466667		11	45	0	0	42	1	0	0.517241		11	38	0	36	0	1	1	1		11	66	0	68	0	1	1	1
			12	24	32	26	24	0.428571	0.52	0.471698						average	99.6364	0.21645	49.3809		12	52	0	55	0	1	1	1		12	47	0	42	0	1	1	1
			13	25	22	24	21	0.531915	0.533333	0.532609						st Dev	1.20605	0.717884	2.76789		13	52	0	51	0	1	1	1		13	53	0	57	0	1	1	1
			14	25	24	29	27	0.510204	0.517857	0.514286											14	63	0	60	0	1	1	1		14	41	0	45	0	1	1	1
			15	24	30	27	24	0.444444	0.529412	0.485714		12	0	55	57	0	0	1	0.508929		15	57	0	59	0	1	1	1		15	51	0	60	0	1	1	1
			16	30	28	25	29	0.517241	0.462963	0.491071		13	0	55	57	0	0	1	0.508929		16	47	0	44	0	1	1	1		16	57	0	53	0	1	1	1
			17	27	20	20	19	0.574468	0.512821	0.546512		14	0	62	71	0	0	1	0.533835		17	52	0	56	0	1	1	1		17	45	0	37	0	1	1	1
			18	22	18	19	24	0.55	0.44186	0.493976		15	0	56	62	0	0	1	0.525424		18	49	0	43	0	1	1	1		18	55	0	48	0	1	1	1
			19	26	32	32	34	0.448276	0.484848	0.467742		16	3	63	61	0	0.0454545	1	0.503937		19	46	0	47	0	1	1	1		19	52	0	58	0	1	1	1
			20	29	33	31	36	0.467742	0.462687	0.465116		17	0	53	62	0	0	1	0.53913		20	53	0	55	0	1	1	1		20	42	0	45	0	1	1	1
							average	49.1511	49.1907	49.1647		18	0	61	59	1	0	0.983333	0.487603						average	100	100	100						average	100	100	100
							st Dev	4.39219	3.37475	2.83077		19	0	51	45	0	0	1	0.46875						st Dev	0	0	0						st Dev	0	0	0
												20	0	49	47	0	0	1	0.489583
																average	0.505051	99.8148	50.7347
																st Dev	1.51515	0.555556	2.30496
