# Supplementary material for: Development of a confinable gene drive system in the human disease vector Aedes aegypti
Source: eLife. 2020 Jan 21;9:e51701. doi: 10.7554/eLife.51701 (PMC6974361; doi:10.7554/eLife.51701)
Supplement: Supplementary file 3. — (a) Eye phenotypes in G1 progeny from ♂wGDe/w+ X ♀ exu-Cas9/exu-Cas9. (b) Eye phenotypes in G1 progeny from ♀wGDe/w+ X ♂exu-Cas9/exu-Cas9. (c) Eye phenotypes in G2 progeny from trans-heterozygous ♀wGDe/w+; exu-Cas9/+ with Maternal Cas9 X ♂w+/w+ (wt). (d) Eye phenotypes in G2 progeny from trans-heterozygous ♂wGDe/w+; exu-Cas9/+ with Maternal Cas9 X ♀w+/w+ (wt). (e) Eye phenotypes in G2 progeny from trans-heterozygous ♀wGDe/w+; exu-Cas9/+ with Paternal Cas9 X ♂w+/w+ (wt). (f) Eye phenotypes in G2 progeny from trans-heterozygous ♂wGDe/w+; exu-Cas9/+ with Paternal Cas9 X ♀w+/w+ (wt). [file elife-51701-supp3.xlsx]

## Sheet: Supplementary File 3a
Legend:			Supplementary File 3a. Eye phenotypes in G1 progeny from ♂w[GDe]/w+ X ♀ exu-Cas9/exu-Cas9.
Phenotype	code
tdTomato+	T		#	♂w[U6a-GDe]/w+ X ♀exu-Cas9/exu-Cas9								Somatic
tdTomato-	t			G1 ♀ progeny				G1 ♂ progeny				white
Black eyes	W			TW	Tw	Tm	tW	TW	Tw	Tm	tW	mosaicism
Mosaic eyes	m		1	28	0	16	0	0	0	0	50	0.363636
White eyes	w		2	38	0	15	0	1	0	0	49	0.277778
			3	29	0	18	0	0	0	0	45	0.382979
			4	34	0	21	0	0	0	0	52	0.381818
			5	37	0	14	0	0	0	0	56	0.27451
			6	28	0	21	0	0	0	0	52	0.428571
			7	27	0	15	0	0	0	0	45	0.357143
			8	26	0	20	0	0	0	0	50	0.434783
			9	44	0	28	0	0	0	0	64	0.388889
			10	45	0	16	0	0	0	0	56	0.262295
			11	48	0	17	0	0	0	0	68	0.261538
			12	43	0	20	0	0	0	0	58	0.31746
			13	29	0	21	0	0	0	0	53	0.42
			14	0	0	0	49	30	0	15	0	0.333333
			15	0	0	0	40	31	0	13	0	0.295455
			16	0	0	0	51	38	0	20	0	0.344828
			17	0	0	0	47	24	0	18	0	0.428571
			18	0	0	0	56	38	0	19	0	0.333333
			19	0	0	0	54	37	0	20	0	0.350877
			20	0	0	0	55	42	0	18	0	0.3
			Total	456	0	242	352	241	0	123	698	0.34689	0.0569582
			#	♂w[U6b-GDe]/w+ X ♀exu-Cas9/exu-Cas9								Somatic
				G1 ♀ progeny				G1 ♂ progeny				white
				TW	Tw	Tm	tW	TW	Tw	Tm	tW	mosaicism
			1	1	0	55	0	0	0	0	55	0.982143
			2	4	0	40	0	0	0	0	47	0.909091
			3	0	0	48	0	0	0	0	51	1
			4	1	0	59	2	0	0	0	58	0.983333
			5	1	0	52	2	0	0	0	56	0.981132
			6	0	0	48	0	0	0	0	54	1
			7	3	0	45	0	0	0	2	53	0.94
			8	2	0	49	0	0	0	0	51	0.960784
			9	2	0	50	0	0	0	0	55	0.961538
			10	1	0	45	0	0	0	0	43	0.978261
			11	2	0	56	0	0	0	0	55	0.965517
			12	0	0	0	51	2	0	47	0	0.959184
			13	0	0	0	45	3	0	43	0	0.934783
			14	0	0	0	51	0	0	47	0	1
			15	0	0	0	53	4	0	52	0	0.928571
			16	0	0	0	55	2	0	54	0	0.964286
			17	0	0	0	47	1	0	41	0	0.97619
			18	0	0	1	54	3	0	56	0	0.95
			19	0	0	0	50	0	0	54	0	1
			20	0	0	0	52	4	0	45	0	0.918367
			Total	21	0	647	358	15	0	342	680	0.964659	0.0276671
			#	♂w[U6c-GDe]/w+ X ♀exu-Cas9/exu-Cas9								Somatic
				G1 ♀ progeny				G1 ♂ progeny				white
				TW	Tw	Tm	tW	TW	Tw	Tm	tW	mosaicism
			1	0	0	42	0	0	0	0	40	1
			2	0	0	53	0	0	0	0	47	1
			3	0	0	47	0	0	0	0	50	1
			4	0	0	46	0	0	0	0	53	1
			5	0	0	50	0	0	0	0	53	1
			6	0	0	48	0	0	0	0	43	1
			7	0	0	45	0	0	0	0	50	1
			8	0	0	39	0	0	0	0	45	1
			9	0	0	46	0	0	0	0	52	1
			10	0	0	47	0	0	0	0	43	1
			11	0	0	52	0	0	0	0	46	1
			12	0	0	57	0	0	0	0	55	1
			13	0	0	60	0	0	0	2	62	1
			14	0	0	0	45	0	0	45	0	1
			15	0	0	0	43	0	0	42	0	1
			16	0	0	0	57	0	0	58	0	1
			17	0	0	0	53	0	0	45	0	1
			18	0	0	0	46	0	0	44	0	1
			19	0	0	1	50	0	0	46	0	1
			20	0	0	0	56	0	0	61	0	1
			Total	0	0	633	350	0	0	343	639	1	0
			#	♂w[U6d-GDe]/w+ X ♀exu-Cas9/exu-Cas9								Somatic
				G1 ♀ progeny				G1 ♂ progeny				white
				TW	Tw	Tm	tW	TW	Tw	Tm	tW	mosaicism
			1	54	0	0	0	0	0	0	52	0
			2	55	0	0	0	0	0	0	53	0
			3	68	0	0	0	0	0	0	60	0
			4	58	0	0	0	0	0	0	53	0
			5	52	0	0	1	2	0	0	50	0
			6	54	0	0	0	0	0	0	47	0
			7	53	0	0	0	0	0	0	48	0
			8	65	0	0	0	0	0	0	54	0
			9	54	0	0	0	0	0	0	51	0
			10	59	0	0	0	0	0	0	50	0
			11	63	0	0	0	0	0	0	55	0
			12	56	0	0	0	0	0	0	47	0
			13	0	0	0	51	61	0	0	0	0
			14	0	0	0	53	60	0	0	1	0
			15	1	0	0	54	63	0	0	0	0
			16	0	0	0	49	57	0	0	0	0
			17	0	0	0	45	49	0	0	0	0
			18	0	0	0	54	62	0	0	0	0
			19	0	0	0	53	52	0	0	0	0
			20	0	0	0	46	56	0	0	0	0
			Total	692	0	0	406	462	0	0	621	0	0

## Sheet: Supplementary File 3b
Legend:			Supplementary File 3b. Eye phenotypes in G1 progeny from ♀w[GDe]/w+ X ♂exu-Cas9/exu-Cas9.
Phenotype	code
tdTomato+	T
tdTomato-	t		cross	♀w[U6a-GDe]/w+ X ♂exu-Cas9/exu-Cas9								Somatic
Black eyes	W			G1 ♀ progeny				G1 ♂ progeny				white
Mosaic eyes	m			TW	Tw	Tm	tW	TW	Tw	Tm	tW	mosaicism
White eyes	w		1	29	0	0	28	30	0	0	26	0
			2	31	0	0	28	28	0	0	31	0
			3	25	0	0	29	22	0	0	30	0
			4	22	0	0	27	20	0	0	19	0
			5	23	0	0	27	18	0	0	23	0
			6	33	0	0	27	29	0	0	28	0
			7	30	0	0	34	35	0	0	30	0
			8	26	0	0	21	25	0	0	26	0
			9	26	0	0	22	31	0	0	29	0
			10	27	0	0	22	35	0	0	27	0
			11	25	0	0	23	24	0	0	21	0
			12	22	0	0	34	23	0	0	28	0
			13	27	0	0	25	23	0	0	27	0
			14	33	0	0	28	28	0	0	24	0
			15	26	0	0	30	26	0	0	33	0
			16	28	0	0	24	28	0	0	29	0
			17	25	0	0	29	21	0	0	24	0
			18	27	0	0	34	24	0	0	36	0
			19	22	0	0	24	29	0	0	22	0
			20	22	0	0	25	23	0	0	26	0
			Total	529	0	0	541	522	0	0	539	0
			cross	♀w[U6b-GDe]/w+ X ♂exu-Cas9/exu-Cas9								Somatic
				G1 ♀ progeny				G1 ♂ progeny				white
				TW	Tw	Tm	tW	TW	Tw	Tm	tW	mosaicism
			1	30	0	0	26	30	0	0	30	0
			2	31	0	0	32	32	0	0	31	0
			3	29	0	0	33	23	0	0	27	0
			4	27	0	0	27	22	0	0	28	0
			5	24	0	0	21	21	0	0	24	0
			6	30	0	0	29	26	0	0	33	0
			7	26	0	0	26	31	0	0	26	0
			8	23	0	0	18	27	0	0	23	0
			9	31	0	0	22	29	0	0	30	0
			10	26	0	0	33	30	0	0	37	0
			11	31	0	0	28	24	0	0	31	0
			12	24	0	0	22	27	0	0	24	0
			13	27	0	0	27	25	0	0	31	0
			14	26	0	0	19	21	0	0	21	0
			15	20	0	0	25	25	0	0	20	0
			16	26	0	0	29	28	0	0	26	0
			17	24	0	0	25	21	0	0	28	0
			18	31	0	0	28	35	0	0	31	0
			19	24	0	0	28	26	0	0	24	0
			20	28	0	0	27	29	0	0	25	0
			Total	538	0	0	525	532	0	0	550
			cross	♀w[U6c-GDe]/w+ X ♂exu-Cas9/exu-Cas9								Somatic
				G1 ♀ progeny				G1 ♂ progeny				white
				TW	Tw	Tm	tW	TW	Tw	Tm	tW	mosaicism
			1	23	0	0	20	27	0	0	23	0
			2	30	0	0	28	32	0	0	33	0
			3	26	0	0	26	23	0	0	31	0
			4	27	0	0	29	22	0	0	25	0
			5	19	0	0	33	34	0	0	29	0
			6	25	0	0	21	30	0	0	25	0
			7	27	0	0	33	26	0	0	27	0
			8	22	0	0	21	25	0	0	19	0
			9	28	0	0	32	25	0	0	26	0
			10	27	0	0	30	28	0	0	33	0
			11	25	0	0	27	30	0	0	32	0
			12	25	0	0	22	25	0	0	25	0
			13	26	0	0	31	30	0	0	26	0
			14	25	0	0	24	23	0	0	25	0
			15	27	0	0	28	24	0	0	27	0
			16	33	0	0	25	29	0	0	29	0
			17	26	0	0	26	31	0	0	28	0
			18	28	0	0	32	33	0	0	28	0
			19	21	0	0	23	26	0	0	26	0
			20	25	0	0	27	28	0	0	25	0
			Total	515	0	0	538	551	0	0	542	0
			cross	♀w[U6a-GDe]/w+ X ♂exu-Cas9/exu-Cas9								Somatic
				G1 ♀ progeny				G1 ♂ progeny				white
				TW	Tw	Tm	tW	TW	Tw	Tm	tW	mosaicism
			1	23	0	0	38	27	0	0	33	0
			2	23	0	0	25	27	0	0	21	0
			3	20	0	0	26	23	0	0	23	0
			4	25	0	0	29	29	0	0	32	0
			5	29	0	0	22	26	0	0	29	0
			6	25	0	0	41	23	0	0	34	0
			7	27	0	0	33	26	0	0	27	0
			8	30	0	0	31	25	0	0	31	0
			9	28	0	0	32	32	0	0	34	0
			10	34	0	0	30	28	0	0	20	0
			11	30	0	0	36	30	0	0	32	0
			12	23	0	0	22	25	0	0	27	0
			13	26	0	0	21	25	0	0	18	0
			14	29	0	0	30	23	0	0	25	0
			15	27	0	0	28	24	0	0	35	0
			16	36	0	0	25	29	0	0	31	0
			17	26	0	0	26	21	0	0	29	0
			18	28	0	0	32	22	0	0	37	0
			19	26	0	0	35	26	0	0	26	0
			20	28	0	0	24	35	0	0	25	0
			Total	543	0	0	586	526	0	0	569

## Sheet: Supplementary File 3c
Legend:			Supplementary File 3c.. Eye phenotypes in G2 progeny from trans-heterozygous ♀w[GDe]/w+; exu-Cas9/+ with Maternal Cas9 X ♂w+/w+ (wt).
Phenotype	code
tdTomato+	T		Founder	cross	♀w[U6a-GDe]/w+; exu-Cas9/+ X ♂w+/w+										Somatic	Transmission
tdTomato-	t				G2 ♀ progeny					G2 ♂ progeny					white	GDe	w-
Black eyes	W				TW	Tw	Tm	tW	tw	TW	Tw	Tm	tW	tw	mosaicism	rate	rate
Mosaic eyes	m		♀	1	22	0	13	22	0	19	0	18	24	0	0.430556	0.610169	0
White eyes	w		♀	2	18	0	8	12	0	20	0	8	12	0	0.296296	0.692308	0
			♀	3	22	0	7	23	0	14	0	10	20	0	0.320755	0.552083	0
			♀	4	23	0	11	19	0	22	0	8	16	0	0.296875	0.646465	0
			♀	5	19	0	7	13	0	16	0	6	10	0	0.270833	0.676056	0
			♀	6	19	1	9	16	0	14	0	10	15	0	0.377358	0.630952	0.0120482
			♀	7	20	0	15	10	0	15	0	11	14	0	0.42623	0.717647	0
			♀	8	18	0	6	26	0	8	0	9	19	0	0.365854	0.476744	0
			♀	9	28	0	7	21	0	19	0	6	17	0	0.216667	0.612245	0
			♀	10	31	0	9	20	0	15	0	15	18	0	0.342857	0.648148	0
			♀	11	22	0	8	34	0	27	0	9	29	0	0.257576	0.511628	0
			♀	12	12	0	10	17	0	15	0	7	13	0	0.386364	0.594595	0
			♀	13	15	0	12	12	0	16	0	12	16	0	0.436364	0.662651	0
			♀	14	21	0	8	15	0	10	0	11	17	0	0.38	0.609756	0
			♀	15	9	0	14	20	0	23	0	11	16	0	0.438596	0.612903	0
			♀	16	15	0	12	23	0	25	0	8	21	0	0.333333	0.576923	0
			♀	17	20	0	7	22	0	14	0	10	16	0	0.333333	0.573034	0
			♀	18	21	0	8	14	0	6	0	11	13	0	0.413043	0.630137	0
			♀	19	14	0	14	22	0	18	0	12	17	0	0.448276	0.597938	0
			♀	20	22	0	6	16	0	25	0	7	19	0	0.216667	0.631579	0
														Average =	0.349392	0.613198	0.00060241
														St Dev =	0.0732655	0.0575984	0.00269406
			Founder	cross	♀w[U6b-GDe]/w+; exu-Cas9/+ X ♂w+/w+										Somatic	Transmission
					G2 ♀ progeny					G2 ♂ progeny					white	GDe	w-
					TW	Tw	Tm	tW	tw	TW	Tw	Tm	tW	tw	mosaicism	rate	rate
			♀	1	2	2	41	14	1	4	0	44	20	0	0.935484	0.726562	0.024
			♀	2	0	0	29	6	0	0	0	35	5	0	1	0.853333	0
			♀	3	0	0	33	9	0	0	1	38	27	0	1	0.666667	0.00934579
			♀	4	1	0	28	18	0	2	0	36	22	0	0.955224	0.626168	0
			♀	5	1	0	30	13	0	0	0	35	7	0	0.984848	0.767442	0
			♀	6	2	1	33	15	1	0	0	40	9	1	0.973684	0.745098	0.030303
			♀	7	3	0	20	10	0	3	1	21	12	0	0.875	0.685714	0.0144928
			♀	8	1	0	41	22	0	0	0	39	22	0	0.987654	0.648	0
			♀	9	0	0	44	10	0	0	0	34	11	0	1	0.787879	0
			♀	10	3	0	21	6	0	0	0	20	8	0	0.931818	0.758621	0
			♀	11	4	1	21	22	0	2	0	23	18	0	0.882353	0.56044	0.0111111
			♀	12	2	1	34	16	0	0	0	44	15	0	0.975309	0.723214	0.00900901
			♀	13	1	0	33	17	0	1	0	29	14	0	0.96875	0.673684	0
			♀	14	1	0	44	10	0	0	0	46	8	0	0.989011	0.834862	0
			♀	15	0	0	26	9	0	0	0	23	14	0	1	0.680556	0
			♀	16	0	0	35	14	0	0	0	38	16	2	1	0.695238	0.0194175
			♀	17	3	0	27	9	0	2	0	28	11	0	0.916667	0.75	0
			♀	18	4	0	36	30	0	3	0	37	33	0	0.9125	0.559441	0
			♀	19	2	0	31	10	0	0	0	31	10	0	0.96875	0.761905	0
			♀	20	0	0	30	16	0	0	0	33	14	0	1	0.677419	0
														Average =	0.962853	0.709112	0.00588396
														St Dev =	0.0404202	0.0780229	0.00940575
			Founder	cross	♀w[U6c-GDe]/w+; exu-Cas9/+ X ♂w+/w+										Somatic	Transmission
					G2 ♀ progeny					G2 ♂ progeny					white	GDe	w-
					TW	Tw	Tm	tW	tw	TW	Tw	Tm	tW	tw	mosaicism	rate	rate
			♀	1	0	0	23	18	0	0	0	22	21	0	1	0.535714	0
			♀	2	0	0	28	25	0	0	0	24	20	0	1	0.536082	0
			♀	3	0	0	33	22	0	0	0	33	27	0	1	0.573913	0
			♀	4	0	0	29	26	0	0	0	40	27	0	1	0.565574	0
			♀	5	0	0	31	22	0	0	0	35	27	0	1	0.573913	0
			♀	6	0	0	42	32	1	0	0	37	30	0	1	0.556338	0.0070922
			♀	7	0	0	29	23	0	0	0	26	23	0	1	0.544554	0
			♀	8	0	0	29	23	0	0	0	35	29	0	1	0.551724	0
			♀	9	0	0	20	18	0	0	1	22	15	0	1	0.565789	0.0133333
			♀	10	0	0	23	19	0	0	0	19	14	0	1	0.56	0
			♀	11	0	0	24	23	0	0	0	24	27	1	1	0.484848	0.0102041
			♀	12	0	0	25	27	0	0	0	26	24	0	1	0.5	0
			♀	13	0	0	25	15	0	0	0	29	18	0	1	0.62069	0
			♀	14	0	0	22	14	0	0	0	28	18	0	1	0.609756	0
			♀	15	0	0	30	19	0	0	0	27	21	0	1	0.587629	0
			♀	16	0	0	22	18	0	0	0	21	14	0	1	0.573333	0
			♀	17	0	0	26	22	0	0	0	21	16	0	1	0.552941	0
			♀	18	0	0	23	27	0	0	0	27	26	0	1	0.485437	0
			♀	19	0	0	26	18	0	0	0	31	17	0	1	0.619565	0
			♀	20	0	0	24	20	0	0	0	26	17	0	1	0.574713	0
														Average =	1	0.558626	0.00153148
														St Dev =	0	0.0381258	0.00387496
			Founder	cross	♀w[U6d-GDe]/w+; exu-Cas9/+ X ♂w+/w+										Somatic	Transmission
					G2 ♀ progeny					G2 ♂ progeny					white	GDe	w-
					TW	Tw	Tm	tW	tw	TW	Tw	Tm	tW	tw	mosaicism	rate	rate
			♀	1	18	0	0	18	0	20	0	0	16	0	0	0.527778	0
			♀	2	22	0	0	22	0	19	0	0	18	0	0	0.506173	0
			♀	3	22	0	0	22	0	22	0	0	25	0	0	0.483516	0
			♀	4	19	0	0	16	0	23	0	0	13	0	0	0.591549	0
			♀	5	27	0	0	22	0	33	0	0	25	0	0	0.560748	0
			♀	6	28	0	0	20	0	24	0	0	17	0	0	0.58427	0
			♀	7	32	0	0	25	0	28	0	0	22	0	0	0.560748	0
			♀	8	27	0	0	23	0	29	0	0	27	0	0	0.528302	0
			♀	9	24	0	0	22	0	29	0	0	30	0	0	0.504762	0
			♀	10	24	0	0	20	0	28	0	0	23	0	0	0.547368	0
			♀	11	29	0	0	24	0	26	0	0	30	0	0	0.504587	0
			♀	12	24	0	0	21	0	24	0	0	23	0	0	0.521739	0
			♀	13	20	0	0	20	0	24	0	0	26	0	0	0.488889	0
			♀	14	29	0	0	21	0	27	0	0	25	0	0	0.54902	0
			♀	15	26	0	0	29	0	23	0	0	25	0	0	0.475728	0
			♀	16	20	0	0	20	0	22	0	0	16	0	0	0.538462	0
			♀	17	19	0	0	21	0	24	0	0	18	0	0	0.52439	0
			♀	18	25	0	0	27	0	26	0	0	23	0	0	0.50495	0
			♀	19	25	0	0	27	0	30	0	0	24	0	0	0.518868	0
			♀	20	19	0	0	19	0	16	0	0	19	0	0	0.479452	0
														Average =	0	0.525065	0
														St Dev =	0	0.0331925	0

## Sheet: Supplementary File 3d
Legend:			Supplementary File 3d. Eye phenotypes in G2 progeny from trans-heterozygous ♂w[GDe]/w+; exu-Cas9/+ with Maternal Cas9 X ♀w+/w+ (wt).
Phenotype	code
tdTomato+	T		Founder	cross	♂w[U6a-GDe]/w+; exu-Cas9/+ X ♀w+/w+										Somatic	Transmission
tdTomato-	t				G2 ♀ progeny					G2 ♂ progeny					white	GDe	w-
Black eyes	W				TW	Tw	Tm	tW	tw	TW	Tw	Tm	tW	tw	mosaicism	rate	rate
Mosaic eyes	m		♂	1	0	0	0	61	0	63	0	0	0	0	0	0.508065	0
White eyes	w		♂	2	0	0	0	55	0	47	0	0	0	0	0	0.460784	0
			♂	3	0	0	0	51	0	52	0	0	0	0	0	0.504854	0
			♂	4	0	0	0	71	0	61	0	0	0	0	0	0.462121	0
			♂	5	0	0	0	56	0	65	0	0	0	0	0	0.53719	0
			♂	6	0	0	0	51	0	46	0	0	0	0	0	0.474227	0
			♂	7	0	0	0	46	0	41	0	0	0	0	0	0.471264	0
			♂	8	0	0	0	41	0	51	0	0	0	0	0	0.554348	0
			♂	9	0	0	0	39	0	42	0	0	0	0	0	0.518519	0
			♂	10	0	0	0	40	0	36	0	0	0	0	0	0.473684	0
			♂	11	0	0	0	46	0	64	0	0	0	0	0	0.581818	0
			♂	12	0	0	0	53	0	50	0	0	0	0	0	0.485437	0
			♂	13	0	0	0	50	0	48	0	0	0	0	0	0.489796	0
			♂	14	0	0	0	47	0	46	0	0	0	0	0	0.494624	0
			♂	15	0	0	0	48	0	42	0	0	0	0	0	0.466667	0
			♂	16	0	0	0	47	0	44	0	0	0	0	0	0.483516	0
			♂	17	0	0	0	43	0	40	0	0	0	0	0	0.481928	0
			♂	18	2	0	0	54	0	57	0	0	0	0	0	0.522124	0
			♂	19	0	0	0	50	0	45	0	0	0	0	0	0.473684	0
			♂	20	0	0	0	39	0	40	0	0	0	0	0	0.506329	0
														Average =	0	0.497549	0
														St Dev =	0	0.0322606	0
			Founder	cross	♂w[U6b-GDe]/w+; exu-Cas9/+ X ♀w+/w+										Somatic	Transmission
					G2 ♀ progeny					G2 ♂ progeny					white	GDe	w-
					TW	Tw	Tm	tW	tw	TW	Tw	Tm	tW	tw	mosaicism	rate	rate
			♂	1	0	0	0	51	0	40	0	0	0	0	0	0.43956	0
			♂	2	0	0	0	45	0	43	0	0	0	0	0	0.488636	0
			♂	3	0	0	0	61	0	56	0	0	2	0	0	0.470588	0
			♂	4	0	0	0	66	0	69	0	0	0	0	0	0.511111	0
			♂	5	0	0	0	43	0	39	0	0	0	0	0	0.47561	0
			♂	6	1	0	0	55	0	59	0	0	0	0	0	0.521739	0
			♂	7	0	0	0	57	0	50	0	0	0	0	0	0.46729	0
			♂	8	0	0	0	46	0	46	0	0	0	0	0	0.5	0
			♂	9	0	0	0	49	0	52	0	0	0	0	0	0.514851	0
			♂	10	0	0	0	51	0	47	0	0	0	0	0	0.479592	0
			♂	11	0	0	0	40	0	33	0	0	0	0	0	0.452055	0
			♂	12	1	0	0	45	0	49	0	0	0	0	0	0.526316	0
			♂	13	0	0	0	47	0	44	0	0	0	0	0	0.483516	0
			♂	14	0	0	0	37	0	54	0	0	0	0	0	0.593407	0
			♂	15	0	0	0	54	0	49	0	0	0	0	0	0.475728	0
			♂	16	0	0	0	62	0	56	0	0	0	0	0	0.474576	0
			♂	17	0	0	0	55	0	60	0	0	0	0	0	0.521739	0
			♂	18	0	0	0	57	0	51	0	0	0	0	0	0.472222	0
			♂	19	0	0	0	45	0	61	0	0	0	0	0	0.575472	0
			♂	20	0	0	0	52	0	47	0	0	0	0	0	0.474747	0
														Average =	0	0.495938	0
														St Dev =	0	0.0383997	0
			Founder	cross	♂w[U6c-GDe]/w+; exu-Cas9/+ X ♀w+/w+										Somatic	Transmission
					G2 ♀ progeny					G2 ♂ progeny					white	GDe	w-
					TW	Tw	Tm	tW	tw	TW	Tw	Tm	tW	tw	mosaicism	rate	rate
			♂	1	0	0	0	51	0	47	0	0	0	0	0	0.479592	0
			♂	2	0	0	0	66	0	61	0	0	0	0	0	0.480315	0
			♂	3	0	0	0	44	0	62	0	0	0	0	0	0.584906	0
			♂	4	0	0	0	73	0	64	0	0	0	0	0	0.467153	0
			♂	5	0	0	0	40	0	35	0	0	0	0	0	0.466667	0
			♂	6	0	0	0	48	0	45	0	0	2	0	0	0.473684	0
			♂	7	0	0	0	43	0	35	0	0	0	0	0	0.448718	0
			♂	8	0	0	0	56	0	50	0	0	0	0	0	0.471698	0
			♂	9	0	0	0	39	0	40	0	0	0	0	0	0.506329	0
			♂	10	0	0	0	54	0	47	0	0	0	0	0	0.465347	0
			♂	11	0	0	0	41	0	44	0	0	0	0	0	0.517647	0
			♂	12	0	0	0	50	0	53	0	0	0	0	0	0.514563	0
			♂	13	0	0	0	50	0	45	0	0	0	0	0	0.473684	0
			♂	14	0	0	0	43	0	34	0	0	0	0	0	0.441558	0
			♂	15	3	0	0	64	0	62	0	0	0	0	0	0.503876	0
			♂	16	0	0	0	53	0	46	0	0	0	0	0	0.464646	0
			♂	17	0	0	0	47	0	38	0	0	0	0	0	0.447059	0
			♂	18	0	0	0	44	0	56	0	0	0	0	0	0.56	0
			♂	19	0	0	0	56	0	64	0	0	0	0	0	0.533333	0
			♂	20	0	0	0	45	0	46	0	0	0	0	0	0.505495	0
														Average =	0	0.490314	0
														St Dev =	0	0.0377883	0
			Founder	cross	♂w[U6d-GDe]/w+; exu-Cas9/+ X ♀w+/w+										Somatic	Transmission
					G2 ♀ progeny					G2 ♂ progeny					white	GDe	w-
					TW	Tw	Tm	tW	tw	TW	Tw	Tm	tW	tw	mosaicism	rate	rate
			♂	1	0	0	0	48	0	52	0	0	1	0	0	0.514851	0
			♂	2	0	0	0	55	0	53	0	0	0	0	0	0.490741	0
			♂	3	0	0	0	60	0	64	0	0	0	0	0	0.516129	0
			♂	4	0	0	0	40	0	48	0	0	2	0	0	0.533333	0
			♂	5	0	0	0	61	0	50	0	0	0	0	0	0.45045	0
			♂	6	0	0	0	53	0	57	0	0	0	0	0	0.518182	0
			♂	7	0	0	0	49	0	48	0	0	0	0	0	0.494845	0
			♂	8	0	0	0	51	0	45	0	0	0	0	0	0.46875	0
			♂	9	0	0	0	39	0	40	0	0	0	0	0	0.506329	0
			♂	10	0	0	0	41	0	48	0	0	0	0	0	0.539326	0
			♂	11	0	0	0	42	0	43	0	0	0	0	0	0.505882	0
			♂	12	1	0	0	48	0	47	0	0	0	0	0	0.5	0
			♂	13	0	0	0	49	0	45	0	0	0	0	0	0.478723	0
			♂	14	0	0	0	44	0	44	0	0	0	0	0	0.5	0
			♂	15	0	0	0	50	0	47	0	0	0	0	0	0.484536	0
			♂	16	0	0	0	56	0	56	0	0	0	0	0	0.5	0
			♂	17	0	0	0	43	0	49	0	0	0	0	0	0.532609	0
			♂	18	0	0	0	37	0	41	0	0	0	0	0	0.525641	0
			♂	19	2	0	0	39	0	42	0	0	0	0	0	0.53012	0
			♂	20	0	0	0	55	0	50	0	0	0	0	0	0.47619	0
														Average =	0	0.503332	0
														St Dev =	0	0.0237889	0

## Sheet: Supplementary File 3e
Legend:			Supplementary File 3e. Eye phenotypes in G2 progeny from trans-heterozygous ♀w[GDe]/w+; exu-Cas9/+ with Paternal Cas9 X ♂w+/w+ (wt).
Phenotype	code
tdTomato+	T		Founder	cross	♀w[U6a-GDe]/w+; exu-Cas9/+ X ♂w+/w+										Somatic	Transmission
tdTomato-	t				G2 ♀ progeny					G2 ♂ progeny					white	GDe	w-
Black eyes	W				TW	Tw	Tm	tW	tw	TW	Tw	Tm	tW	tw	mosaicism	rate	rate
Mosaic eyes	m		♀	1	27	0	6	23	0	25	0	8	18	0	0.212121	0.616822	0
White eyes	w		♀	2	22	0	9	22	0	26	0	6	21	0	0.238095	0.59434	0
			♀	3	21	0	5	25	0	29	0	4	19	0	0.152542	0.572816	0
			♀	4	27	0	3	20	0	25	0	7	15	0	0.16129	0.639175	0
			♀	5	26	0	8	14	0	24	0	7	19	0	0.230769	0.663265	0
			♀	6	28	0	9	12	0	32	0	7	16	0	0.210526	0.730769	0
			♀	7	26	0	4	15	0	25	0	6	17	0	0.163934	0.655914	0
			♀	8	31	0	6	17	0	27	0	10	18	0	0.216216	0.678899	0
			♀	9	30	0	8	12	0	34	0	5	14	0	0.168831	0.747573	0
			♀	10	25	0	8	29	0	28	0	9	26	0	0.242857	0.56	0
			♀	11	24	0	11	21	0	28	0	8	30	0	0.267606	0.581967	0
			♀	12	31	0	3	16	0	25	0	7	20	0	0.151515	0.647059	0
			♀	13	29	0	6	15	0	24	0	5	20	0	0.171875	0.646465	0
			♀	14	24	0	7	24	0	32	0	5	18	0	0.176471	0.618182	0
			♀	15	25	0	11	19	0	34	0	7	16	0	0.233766	0.6875	0
			♀	16	33	0	8	13	0	27	0	12	10	0	0.25	0.776699	0
			♀	17	29	0	7	13	0	24	0	12	19	0	0.263889	0.692308	0
			♀	18	32	0	6	16	0	24	0	6	22	0	0.176471	0.641509	0
			♀	19	20	0	5	20	0	29	0	4	15	0	0.155172	0.623656	0
			♀	20	28	0	12	18	0	31	0	8	15	0	0.253165	0.705357	0
														Average =	0.204856	0.654014	0
														St Dev =	0.0408362	0.0579849	0
			Founder	cross	♀w[U6b-GDe]/w+; exu-Cas9/+ X ♂w+/w+										Somatic	Transmission
					G2 ♀ progeny					G2 ♂ progeny					white	GDe	w-
					TW	Tw	Tm	tW	tw	TW	Tw	Tm	tW	tw	mosaicism	rate	rate
			♀	1	1	0	36	18	0	3	0	44	16	0	0.952381	0.711864	0
			♀	2	3	0	39	6	0	5	0	31	7	0	0.897436	0.857143	0
			♀	3	2	1	33	18	1	0	0	36	21	0	0.972222	0.642857	0.0181818
			♀	4	1	0	34	29	0	3	1	27	25	1	0.939394	0.545455	0.0168067
			♀	5	0	0	29	19	0	1	0	34	14	0	0.984375	0.659794	0
			♀	6	1	0	31	12	0	3	0	38	16	0	0.945205	0.722772	0
			♀	7	0	0	32	11	0	2	0	40	10	0	0.972973	0.778947	0
			♀	8	3	0	34	10	1	5	0	27	13	1	0.884058	0.734043	0.0217391
			♀	9	4	0	36	7	0	3	0	37	9	0	0.9125	0.833333	0
			♀	10	2	1	36	16	0	4	0	33	15	0	0.921053	0.71028	0.00943396
			♀	11	4	0	34	16	0	5	0	35	15	1	0.884615	0.709091	0.00917431
			♀	12	2	0	36	20	0	3	0	37	16	0	0.935897	0.684211	0
			♀	13	2	0	31	18	0	5	1	33	14	0	0.902778	0.692308	0.00970874
			♀	14	3	0	30	11	0	2	0	36	10	0	0.929577	0.771739	0
			♀	15	1	0	34	17	0	3	0	29	18	1	0.940299	0.650485	0.00980392
			♀	16	4	0	35	10	0	3	0	36	11	0	0.910256	0.787879	0
			♀	17	6	0	38	19	0	3	1	38	23	0	0.895349	0.671875	0.00787402
			♀	18	1	1	39	16	0	1	0	35	21	0	0.974026	0.675439	0.00884956
			♀	19	1	0	35	14	0	3	0	32	13	0	0.943662	0.72449	0
			♀	20	0	1	35	17	0	2	0	37	14	0	0.973333	0.707547	0.00952381
					41	4	687	304	2	59	3	695	301	Average =	0.93357	0.713578	0.0060548
														St Dev =	0.0318252	0.0701391	0.00705984
			Founder	cross	♀w[U6c-GDe]/w+; exu-Cas9/+ X ♂w+/w+										Somatic	Transmission
					G2 ♀ progeny					G2 ♂ progeny					white	GDe	w-
					TW	Tw	Tm	tW	tw	TW	Tw	Tm	tW	tw	mosaicism	rate	rate
			♀	1	0	0	34	22	0	0	0	30	20	0	1	0.603774	0
			♀	2	0	0	23	17	0	0	0	25	24	0	1	0.539326	0
			♀	3	0	0	21	26	0	0	0	29	33	0	1	0.458716	0
			♀	4	0	0	24	23	0	0	0	27	18	0	1	0.554348	0
			♀	5	0	0	35	25	0	0	0	32	19	0	1	0.603604	0
			♀	6	0	0	38	21	0	0	0	32	28	0	1	0.588235	0
			♀	7	0	0	22	17	0	0	0	24	25	0	1	0.522727	0
			♀	8	0	0	35	22	0	0	0	40	25	0	1	0.614754	0
			♀	9	0	0	30	24	0	0	0	29	17	0	1	0.59	0
			♀	10	0	0	21	13	0	0	0	23	13	0	1	0.628571	0
			♀	11	0	0	20	11	0	0	0	28	13	0	1	0.666667	0
			♀	12	0	0	33	24	0	0	0	28	19	0	1	0.586538	0
			♀	13	0	0	30	25	0	0	0	24	31	0	1	0.490909	0
			♀	14	0	0	32	20	0	0	0	40	17	0	1	0.66055	0
			♀	15	0	0	27	23	0	0	0	24	22	0	1	0.53125	0
			♀	16	0	0	36	26	0	0	0	28	30	0	1	0.533333	0
			♀	17	0	0	23	24	0	0	0	30	24	0	1	0.524752	0
			♀	18	0	0	22	31	0	0	0	30	28	0	1	0.468468	0
			♀	19	0	0	31	15	0	0	0	22	12	0	1	0.6625	0
			♀	20	0	0	26	15	0	0	0	29	16	0	1	0.639535	0
														Average =	1	0.573428	0
														St Dev =	0	0.0635245	0
			Founder	cross	♀w[U6d-GDe]/w+; exu-Cas9/+ X ♂w+/w+										Somatic	Transmission
					G2 ♀ progeny					G2 ♂ progeny					white	GDe	w-
					TW	Tw	Tm	tW	tw	TW	Tw	Tm	tW	tw	mosaicism	rate	rate
			♀	1	32	0	0	22	0	27	0	0	23	0	0	0.567308	0
			♀	2	17	0	0	23	0	26	0	0	25	0	0	0.472527	0
			♀	3	33	0	0	26	0	34	0	0	25	0	0	0.567797	0
			♀	4	20	0	0	27	0	22	0	0	33	0	0	0.411765	0
			♀	5	18	0	0	23	0	14	0	0	19	0	0	0.432432	0
			♀	6	26	0	0	25	0	25	0	0	30	0	0	0.481132	0
			♀	7	24	0	0	20	0	23	0	0	23	0	0	0.522222	0
			♀	8	30	0	0	22	0	28	0	0	27	0	0	0.542056	0
			♀	9	20	0	0	24	0	24	0	0	17	0	0	0.517647	0
			♀	10	26	0	0	31	0	30	0	0	28	0	0	0.486957	0
			♀	11	22	0	0	23	0	18	0	0	17	0	0	0.5	0
			♀	12	26	0	0	22	0	26	0	0	30	0	0	0.5	0
			♀	13	16	0	0	22	0	17	0	0	18	0	0	0.452055	0
			♀	14	29	0	0	19	0	33	0	0	22	0	0	0.601942	0
			♀	15	30	0	0	15	0	27	0	0	18	0	0	0.633333	0
			♀	16	25	0	0	17	0	22	0	0	19	0	0	0.566265	0
			♀	17	20	0	0	23	0	26	0	0	20	0	0	0.516854	0
			♀	18	28	0	0	22	0	25	0	0	27	0	0	0.519608	0
			♀	19	19	0	0	25	0	24	0	0	27	0	0	0.452632	0
			♀	20	25	0	0	26	0	22	0	0	29	0	0	0.460784	0
														Average =	0	0.510266	0
														St Dev =	0	0.0573698	0

## Sheet: Supplementary File 3f
Legend:			Supplementary File 3f. Eye phenotypes in G2 progeny from trans-heterozygous ♂w[GDe]/w+; exu-Cas9/+ with Paternal Cas9 X ♀w+/w+ (wt).
Phenotype	code
tdTomato+	T		Founder	cross	♂w[U6a-GDe]/w+; exu-Cas9/+ X ♀w+/w+										Somatic	Transmission
tdTomato-	t				G2 ♀ progeny					G2 ♂ progeny					white	GDe	w-
Black eyes	W				TW	Tw	Tm	tW	tw	TW	Tw	Tm	tW	tw	mosaicism	rate	rate
Mosaic eyes	m		♂	1	37	0	0	0	0	0	0	0	44	0	0	0.45679	0
White eyes	w		♂	2	52	0	0	2	0	0	0	0	62	0	0	0.448276	0
			♂	3	48	0	0	0	0	0	0	0	58	0	0	0.45283	0
			♂	4	57	0	0	0	0	0	0	0	44	0	0	0.564356	0
			♂	5	61	0	0	0	0	0	0	0	56	0	0	0.521368	0
			♂	6	53	0	0	0	0	0	0	0	43	0	0	0.552083	0
			♂	7	55	0	0	0	0	0	0	0	62	0	0	0.470085	0
			♂	8	58	0	0	0	0	0	0	0	63	0	0	0.479339	0
			♂	9	46	0	0	0	0	0	0	0	54	0	0	0.46	0
			♂	10	49	0	0	0	0	0	0	0	56	0	0	0.466667	0
			♂	11	63	0	0	0	0	0	0	0	56	0	0	0.529412	0
			♂	12	62	0	0	0	0	0	0	0	55	0	0	0.529915	0
			♂	13	53	0	0	0	0	0	0	0	50	0	0	0.514563	0
			♂	14	58	0	0	0	0	0	0	0	49	0	0	0.542056	0
			♂	15	48	0	0	0	0	0	0	0	43	0	0	0.527473	0
			♂	16	54	0	0	0	0	0	0	0	47	0	0	0.534653	0
			♂	17	51	0	0	0	0	0	0	0	44	0	0	0.536842	0
			♂	18	58	0	0	0	0	0	0	0	56	0	0	0.508772	0
			♂	19	55	0	0	0	0	0	0	0	49	0	0	0.528846	0
			♂	20	53	0	0	0	0	0	0	0	38	0	0	0.582418	0
														Average =	0	0.510337	0
														St Dev =	0	0.0402162	0
			Founder	cross	♂w[U6b-GDe]/w+; exu-Cas9/+ X ♀w+/w+										Somatic	Transmission
					G2 ♀ progeny					G2 ♂ progeny					white	GDe	w-
					TW	Tw	Tm	tW	tw	TW	Tw	Tm	tW	tw	mosaicism	rate	rate
			♂	1	63	0	0	0	0	0	0	0	52	0	0	0.547826	0
			♂	2	62	0	0	0	0	0	0	0	57	0	0	0.521008	0
			♂	3	44	0	0	0	0	2	0	0	54	0	0	0.46	0
			♂	4	39	0	0	0	0	0	0	0	51	0	0	0.433333	0
			♂	5	49	0	0	0	0	0	0	0	45	0	0	0.521277	0
			♂	6	56	0	0	0	0	0	0	0	51	0	0	0.523364	0
			♂	7	54	0	0	0	0	0	0	0	50	0	0	0.519231	0
			♂	8	44	0	0	0	0	0	0	0	54	0	0	0.44898	0
			♂	9	61	0	0	0	0	0	0	0	52	0	0	0.539823	0
			♂	10	63	0	0	0	0	0	0	0	67	0	0	0.484615	0
			♂	11	54	0	0	0	0	0	0	0	61	0	0	0.469565	0
			♂	12	56	0	0	0	0	0	0	0	59	0	0	0.486957	0
			♂	13	50	0	0	0	0	0	0	0	61	0	0	0.45045	0
			♂	14	47	0	0	0	0	0	0	0	56	0	0	0.456311	0
			♂	15	58	0	0	0	0	0	0	0	42	0	0	0.58	0
			♂	16	63	0	0	0	0	0	0	0	57	0	0	0.525	0
			♂	17	62	0	0	0	0	0	0	0	70	0	0	0.469697	0
			♂	18	52	0	0	1	0	0	0	0	45	0	0	0.530612	0
			♂	19	55	0	0	0	0	0	0	0	47	0	0	0.539216	0
			♂	20	48	0	0	0	0	0	0	0	57	0	0	0.457143	0
														Average =	0	0.49822	0
														St Dev =	0	0.0411794	0
			Founder	cross	♂w[U6c-GDe]/w+; exu-Cas9/+ X ♀w+/w+										Somatic	Transmission
					G2 ♀ progeny					G2 ♂ progeny					white	GDe	w-
					TW	Tw	Tm	tW	tw	TW	Tw	Tm	tW	tw	mosaicism	rate	rate
			♂	1	49	0	0	0	0	0	0	0	45	0	0	0.521277	0
			♂	2	44	0	0	0	0	0	0	0	39	0	0	0.53012	0
			♂	3	55	0	0	0	0	0	0	0	49	0	0	0.528846	0
			♂	4	58	0	0	0	0	0	0	0	55	0	0	0.513274	0
			♂	5	47	0	0	0	0	0	0	0	53	0	0	0.47	0
			♂	6	55	0	0	0	0	1	0	0	55	0	0	0.504505	0
			♂	7	56	0	0	0	0	0	0	0	53	0	0	0.513761	0
			♂	8	46	0	0	0	0	0	0	0	43	0	0	0.516854	0
			♂	9	52	0	0	0	0	0	0	0	53	0	0	0.495238	0
			♂	10	57	0	0	1	0	0	0	0	48	0	0	0.537736	0
			♂	11	61	0	0	0	0	0	0	0	64	0	0	0.488	0
			♂	12	52	0	0	0	0	0	0	0	55	0	0	0.485981	0
			♂	13	43	0	0	1	0	0	0	0	49	0	0	0.462366	0
			♂	14	56	0	0	0	0	0	0	0	52	0	0	0.518519	0
			♂	15	54	0	0	0	0	0	0	0	63	0	0	0.461538	0
			♂	16	50	0	0	0	0	0	0	0	47	0	0	0.515464	0
			♂	17	41	0	0	0	0	0	0	0	42	0	0	0.493976	0
			♂	18	44	0	0	0	0	0	0	0	48	0	0	0.478261	0
			♂	19	52	0	0	0	0	0	0	0	59	0	0	0.468468	0
			♂	20	50	0	0	0	0	0	0	0	52	0	0	0.490196	0
														Average =	0	0.499719	0
														St Dev =	0	0.0236471	0
			Founder	cross	♂w[U6d-GDe]/w+; exu-Cas9/+ X ♀w+/w+										Somatic	Transmission
					G2 ♀ progeny					G2 ♂ progeny					white	GDe	w-
					TW	Tw	Tm	tW	tw	TW	Tw	Tm	tW	tw	mosaicism	rate	rate
			♂	1	53	0	0	0	0	0	0	0	50	0	0	0.514563	0
			♂	2	42	0	0	0	0	0	0	0	54	0	0	0.4375	0
			♂	3	56	0	0	0	0	0	0	0	54	0	0	0.509091	0
			♂	4	54	0	0	0	0	0	0	0	50	0	0	0.519231	0
			♂	5	61	0	0	0	0	0	0	0	46	0	0	0.570093	0
			♂	6	36	0	0	0	0	0	0	0	51	0	0	0.413793	0
			♂	7	43	0	0	0	0	1	0	0	49	0	0	0.473118	0
			♂	8	53	0	0	0	0	0	0	0	55	0	0	0.490741	0
			♂	9	49	0	0	0	0	0	0	0	53	0	0	0.480392	0
			♂	10	53	0	0	0	0	0	0	0	62	0	0	0.46087	0
			♂	11	55	0	0	0	0	0	0	0	65	0	0	0.458333	0
			♂	12	46	0	0	0	0	0	0	0	56	0	0	0.45098	0
			♂	13	62	0	0	3	0	0	0	0	52	0	0	0.529915	0
			♂	14	69	0	0	0	0	0	0	0	43	0	0	0.616071	0
			♂	15	42	0	0	0	0	0	0	0	47	0	0	0.47191	0
			♂	16	55	0	0	2	0	0	0	0	58	0	0	0.478261	0
			♂	17	57	0	0	0	0	0	0	0	55	0	0	0.508929	0
			♂	18	33	0	0	1	0	0	0	0	35	0	0	0.478261	0
			♂	19	50	0	0	0	0	0	0	0	47	0	0	0.515464	0
			♂	20	57	0	0	0	0	0	0	0	45	0	0	0.558824	0
														Average =	0	0.496817	0
														St Dev =	0	0.0478246	0
