# Supplementary material for: Development of a confinable gene drive system in the human disease vector Aedes aegypti
Source: eLife. 2020 Jan 21;9:e51701. doi: 10.7554/eLife.51701 (PMC6974361; doi:10.7554/eLife.51701)
Supplement: Supplementary file 5. — (a) Eye phenotypes in G3, G4, G5 progeny from ♀wU6b-GDe/w+; exu-Cas9/+ X ♂w+/w+ (wt). (b) Eye phenotypes in G3, G4, G5 progeny from ♀wU6b-GDe/w+; nup50-Cas9/+ X ♂w+/w+ (wt). (c) Eye phenotypes in G3, G4, G5 progeny from ♂wU6b-GDe/w+; exu-Cas9/+ X ♀w+/w+ (wt). (d) Eye phenotypes in G3, G4, G5 progeny from ♂wU6b-GDe/w+; nup50-Cas9/+ X ♀w+/w+ (wt). [file elife-51701-supp5.xlsx]

## Sheet: Supplementary File 5a
Legend:			Supplementary File 5a. Eye phenotypes in G3, G4, G5 progeny from ♀w[U6b-GDe]/w+; exu-Cas9/+ X ♂w+/w+ (wt).
Phenotype	code
tdTomato+	T			cross	G2♀w[U6b-GDe]/w+; exu-Cas9/+ X ♂w+/w+										Somatic	Transmission
tdTomato-	t				G3 ♀ progeny					G3 ♂ progeny					white	GDe	w-
Black eyes	W				TW	Tw	Tm	tW	tw	TW	Tw	Tm	tW	tw	mosaicism	rate	rate
Mosaic eyes	m		♀	1	3	0	30	4	0	1	1	37	6	0	0.944444	0.878049	0.0123457
White eyes	w		♀	2	3	0	32	13	0	2	0	34	12	0	0.929577	0.739583	0
			♀	3	3	0	21	21	1	0	0	15	16	1	0.923077	0.5	0.0263158
			♀	4	0	0	20	15	0	0	0	26	21	0	1	0.560976	0
			♀	5	0	1	35	20	0	0	2	29	15	1	1	0.650485	0.040404
			♀	6	2	0	22	16	0	1	0	28	16	0	0.943396	0.623529	0
			♀	7	0	0	36	5	0	0	0	40	9	0	1	0.844444	0
			♀	8	0	0	27	15	1	3	0	33	13	0	0.952381	0.684783	0.010989
			♀	9	4	0	34	10	0	3	1	26	13	0	0.897059	0.747253	0.0111111
			♀	10	0	2	31	10	0	0	0	31	8	0	1	0.780488	0.025
			♀	11	1	0	27	8	0	0	1	33	11	0	0.983871	0.765432	0.0125
			♀	12	0	0	28	13	0	0	0	38	10	0	1	0.741573	0
			♀	13	0	0	32	12	1	0	0	38	13	1	1	0.721649	0.0210526
			♀	14	0	0	33	7	0	2	0	25	6	0	0.966667	0.821918	0
			♀	15	4	1	35	12	0	2	0	40	13	0	0.926829	0.766355	0.00943396
			♀	16	2	0	31	14	2	0	0	24	20	0	0.964912	0.612903	0.021978
			♀	17	0	0	33	11	0	0	0	28	13	0	1	0.717647	0
			♀	18	0	1	31	14	0	0	1	27	16	0	1	0.666667	0.0227273
			♀	19	2	0	24	17	0	0	0	26	14	0	0.961538	0.626506	0
			♀	20	3	0	31	15	0	1	0	38	13	0	0.945205	0.722772	0
					27	5	593	252	5	15	6	616	258	Average =	0.966948	0.708651	0.0106929
														St Dev =	0.0329438	0.0945569	0.0120261
				cross	G3♀w[U6b-GDe]/w+; exu-Cas9/+ X ♂w+/w+										Somatic	Transmission
					G4 ♀ progeny					G4 ♂ progeny					white	GDe	w-
					TW	Tw	Tm	tW	tw	TW	Tw	Tm	tW	tw	mosaicism	rate	rate
			♀	1	1	0	22	11	0	0	1	23	16	0	0.978723	0.635135	0.0136986
			♀	2	2	1	24	21	1	5	1	27	23	2	0.883333	0.560748	0.0490196
			♀	3	1	2	27	10	0	3	0	33	8	0	0.939394	0.785714	0.0243902
			♀	4	0	0	28	17	0	0	0	24	20	0	1	0.58427	0
			♀	5	0	0	32	21	0	1	1	28	17	0	0.983871	0.62	0.010101
			♀	6	0	1	33	6	0	0	0	29	10	0	1	0.797468	0.0128205
			♀	7	1	0	31	16	0	0	0	29	14	0	0.983607	0.67033	0
			♀	8	0	0	25	15	0	0	2	28	21	0	1	0.604396	0.0224719
			♀	9	3	1	23	14	0	2	0	30	12	0	0.915254	0.694118	0.0119048
			♀	10	1	0	31	9	0	3	0	38	7	0	0.945205	0.820225	0
			♀	11	0	0	26	19	1	0	1	21	14	0	1	0.585366	0.025
			♀	12	0	0	21	15	0	0	1	26	9	0	1	0.666667	0.0140845
			♀	13	0	1	30	12	0	0	0	27	20	0	1	0.644444	0.011236
			♀	14	1	0	24	14	0	2	0	21	8	0	0.9375	0.685714	0
			♀	15	2	0	20	8	0	0	0	24	11	1	0.956522	0.69697	0.0153846
			♀	16	0	0	27	13	0	0	1	25	13	0	1	0.670886	0.0128205
			♀	17	0	1	21	11	0	0	0	20	13	0	1	0.636364	0.0153846
			♀	18	2	0	28	15	0	0	0	27	14	0	0.964912	0.662791	0
			♀	19	0	0	23	17	1	0	0	21	13	1	1	0.578947	0.027027
			♀	20	0	0	25	16	0	0	0	28	19	0	1	0.602273	0
					14	7	521	280	3	16	8	529	282	Average =	0.974416	0.660141	0.0132672
														St Dev =	0.0343259	0.0729137	0.0123459
				cross	G4♀w[U6b-GDe]/w+; exu-Cas9/+ X ♂w+/w+										Somatic	Transmission
					G5 ♀ progeny					G5 ♂ progeny					white	GDe	w-
					TW	Tw	Tm	tW	tw	TW	Tw	Tm	tW	tw	mosaicism	rate	rate
			♀	1	4	2	29	11	0	6	1	34	9	0	0.868421	0.791667	0.0322581
			♀	2	0	0	30	13	0	0	0	23	7	0	1	0.726027	0
			♀	3	5	1	27	30	2	2	1	33	34	1	0.898551	0.507353	0.0381679
			♀	4	6	0	27	13	0	10	0	25	10	0	0.764706	0.747253	0
			♀	5	2	0	22	7	0	3	0	25	8	0	0.903846	0.776119	0
			♀	6	0	0	33	23	2	2	0	30	21	0	0.969231	0.585586	0.0183486
			♀	7	0	0	31	24	0	0	0	28	17	1	1	0.584158	0.01
			♀	8	4	0	27	7	0	4	0	27	12	0	0.870968	0.765432	0
			♀	9	6	0	26	11	0	9	0	28	14	0	0.782609	0.734043	0
			♀	10	0	0	25	7	0	1	0	24	12	0	0.98	0.724638	0
			♀	11	5	0	21	8	0	7	1	26	5	0	0.8	0.821918	0.0138889
			♀	12	1	0	40	9	1	3	0	38	15	0	0.95122	0.766355	0.00943396
			♀	13	2	0	31	21	0	1	0	23	14	1	0.947368	0.612903	0.0108696
			♀	14	3	0	29	12	0	4	0	25	14	0	0.885246	0.701149	0
			♀	15	0	0	17	11	0	0	2	21	9	0	1	0.666667	0.0344828
			♀	16	1	0	27	15	0	1	0	23	16	0	0.961538	0.626506	0
			♀	17	3	0	23	19	1	3	0	19	18	0	0.875	0.55814	0.0117647
			♀	18	5	0	28	10	0	5	1	26	8	0	0.846154	0.783133	0.0121951
			♀	19	6	0	29	17	0	7	0	25	19	0	0.80597	0.650485	0
			♀	20	4	2	34	7	0	6	0	37	10	0	0.879518	0.83	0.0204082
					57	5	556	275	6	74	6	540	272	Average =	0.899517	0.697977	0.0105909
														St Dev =	0.0749694	0.0935974	0.0125309

## Sheet: Supplementary File 5b
Legend:			Supplementary File 5b. Eye phenotypes in G3, G4, G5 progeny from ♀w[U6b-GDe]/w+; nup50-Cas9/+ X ♂w+/w+ (wt).
Phenotype	code
tdTomato+	T			cross	G2♀w[U6b-GDe]/w+; nup50-Cas9/+ X ♂w+/w+										Somatic	Transmission
tdTomato-	t				G3 ♀ progeny					G3 ♂ progeny					white	GDe	w-
Black eyes	W				TW	Tw	Tm	tW	tw	TW	Tw	Tm	tW	tw	mosaicism	rate	rate	resistance rate	sum
Mosaic eyes	m		♀	1	0	0	37	3	0	0	0	40	5	0	1	0.905882	0	5	Tw+tm
White eyes	w		♀	2	0	0	41	20	0	0	0	46	17	0	1	0.701613	0	1730	total
			♀	3	0	0	31	8	0	0	0	25	7	0	1	0.788732	0	0.289017	%
			♀	4	0	0	32	12	0	0	0	24	10	0	1	0.717949	0
			♀	5	0	0	27	7	0	0	0	35	7	0	1	0.815789	0
			♀	6	0	0	38	3	1	0	0	34	4	1	1	0.888889	0.0253165
			♀	7	0	0	30	10	0	0	0	25	17	0	1	0.670732	0
			♀	8	0	0	43	4	0	0	0	49	9	0	1	0.87619	0
			♀	9	0	0	28	5	0	0	0	34	8	0	1	0.826667	0
			♀	10	0	0	29	5	0	0	1	33	3	0	1	0.887324	0.0142857
			♀	11	0	0	44	6	0	0	0	43	4	0	1	0.896907	0
			♀	12	0	0	45	6	0	0	0	40	7	0	1	0.867347	0
			♀	13	0	0	27	8	0	0	0	25	9	1	1	0.742857	0.0144928
			♀	14	0	0	32	10	0	0	0	34	18	0	1	0.702128	0
			♀	15	0	0	31	6	0	0	0	40	8	0	1	0.835294	0
			♀	16	0	1	32	16	0	0	0	33	13	0	1	0.694737	0.0106383
			♀	17	0	0	38	10	0	0	0	35	15	0	1	0.744898	0
			♀	18	0	0	37	7	0	0	0	32	6	0	1	0.841463	0
			♀	19	0	0	43	6	0	0	0	36	6	0	1	0.868132	0
			♀	20	0	0	30	6	0	0	0	25	11	0	1	0.763889	0
					0	1	695	158	1	0	1	688	184	Average =	1	0.801871	0.00323666
														St Dev =	0	0.0782981	0.00710337
				cross	G3♀w[U6b-GDe]/w+; nup50-Cas9/+ X ♂w+/w+										Somatic	Transmission
					G4 ♀ progeny					G4 ♂ progeny					white	GDe	w-
					TW	Tw	Tm	tW	tw	TW	Tw	Tm	tW	tw	mosaicism	rate	rate	resistance rate	sum
			♀	1	0	0	55	15	0	0	0	50	15	0	1	0.777778	0	5	Tw+tm
			♀	2	0	1	32	5	0	0	0	35	8	0	1	0.839506	0.0125	1959	total
			♀	3	0	0	29	8	0	0	0	32	12	0	1	0.753086	0	0.255232	%
			♀	4	0	0	45	17	0	0	0	43	14	0	1	0.739496	0
			♀	5	0	0	59	6	0	0	0	42	4	0	1	0.90991	0
			♀	6	0	1	36	16	0	0	0	41	21	0	1	0.678261	0.00877193
			♀	7	0	0	40	4	0	0	0	35	7	0	1	0.872093	0
			♀	8	0	0	42	2	0	0	1	38	3	0	1	0.94186	0.0117647
			♀	9	0	0	23	4	0	0	0	16	3	0	1	0.847826	0
			♀	10	0	0	40	19	0	0	0	42	16	0	1	0.700855	0
			♀	11	0	0	38	7	0	0	0	31	5	0	1	0.851852	0
			♀	12	0	0	42	6	0	0	0	35	4	0	1	0.885057	0
			♀	13	0	0	35	13	0	0	0	26	17	0	1	0.67033	0
			♀	14	0	0	44	4	0	0	0	40	7	0	1	0.884211	0
			♀	15	0	1	47	3	0	0	0	52	3	0	1	0.943396	0.00952381
			♀	16	0	1	45	12	0	0	0	43	10	0	1	0.801802	0.00909091
			♀	17	0	0	29	7	0	0	0	28	8	0	1	0.791667	0
			♀	18	0	0	33	23	0	0	0	37	18	0	1	0.630631	0
			♀	19	0	0	63	6	0	0	0	53	10	0	1	0.878788	0
			♀	20	0	0	30	17	0	0	0	27	22	0	1	0.59375	0
					0	4	807	194	0	0	1	746	207	Average =	1	0.799608	0.00258257
														St Dev =	0	0.103657	0.00465414
				cross	G4♀w[U6b-GDe]/w+; nup50-Cas9/+ X ♂w+/w+										Somatic	Transmission
					G5 ♀ progeny					G5 ♂ progeny					white	GDe	w-
					TW	Tw	Tm	tW	tw	TW	Tw	Tm	tW	tw	mosaicism	rate	rate	resistance rate	sum
			♀	1	0	0	35	7	0	0	0	39	8	0	1	0.831461	0	8	Tw+tm
			♀	2	0	0	45	8	0	0	0	44	5	0	1	0.872549	0	2008	total
			♀	3	0	0	50	9	0	0	0	45	16	0	1	0.791667	0	0.398406	%
			♀	4	0	0	41	11	0	0	1	36	10	0	1	0.787879	0.0102041
			♀	5	0	0	39	5	0	0	0	47	3	0	1	0.914894	0	0.314219	Average
			♀	6	0	0	49	3	0	0	0	54	8	0	1	0.903509	0	0.0748401	SD Dev
			♀	7	0	0	30	13	0	0	0	40	14	0	1	0.721649	0
			♀	8	0	0	37	2	0	0	1	49	5	0	1	0.925532	0.0107527
			♀	9	0	0	51	6	1	0	0	46	10	0	1	0.850877	0.00884956
			♀	10	0	0	37	18	0	0	0	29	16	0	1	0.66	0
			♀	11	0	0	41	13	1	0	0	41	10	0	1	0.773585	0.00952381
			♀	12	0	0	41	5	0	0	0	43	3	0	1	0.913043	0
			♀	13	0	0	51	1	0	0	0	44	4	1	1	0.940594	0.01
			♀	14	0	0	35	5	0	0	0	42	8	0	1	0.855556	0
			♀	15	0	0	42	7	0	0	0	48	5	0	1	0.882353	0
			♀	16	0	0	37	11	1	0	0	34	7	0	1	0.788889	0.011236
			♀	17	0	0	28	14	0	0	0	36	18	1	1	0.659794	0.0104167
			♀	18	0	0	33	13	0	0	0	36	7	0	1	0.775281	0
			♀	19	0	1	60	8	0	0	0	52	7	0	1	0.882812	0.00787402
			♀	20	0	0	38	9	0	0	0	36	7	0	1	0.822222	0
					0	1	820	168	3	0	2	841	171	Average =	1	0.827707	0.00394284
														St Dev =	0	0.082708	0.00499787

## Sheet: Supplementary File 5c
Legend:			Supplementary File 5c. Eye phenotypes in G3, G4, G5 progeny from ♂w[U6b-GDe]/w+; exu-Cas9/+ X ♀w+/w+ (wt).
Phenotype	code
tdTomato+	T			cross	G2 ♂w[U6b-GDe]/w+; exu-Cas9/+ X ♀w+/w+										Somatic	Transmission
tdTomato-	t				G3 ♀ progeny					G3 ♂ progeny					white	GDe	w-
Black eyes	W				TW	Tw	Tm	tW	tw	TW	Tw	Tm	tW	tw	mosaicism	rate	rate
Mosaic eyes	m		♂	1	42	0	0	0	0	0	0	0	39	0	0	0.518519	0
White eyes	w		♂	2	46	0	0	0	0	0	0	0	44	0	0	0.511111	0
			♂	3	45	0	0	0	0	0	0	0	37	0	0	0.54878	0
			♂	4	55	0	0	0	0	0	0	0	62	0	0	0.470085	0
			♂	5	39	0	0	0	0	0	0	0	35	0	0	0.527027	0
			♂	6	59	0	0	0	0	3	0	0	57	0	0	0.521008	0
			♂	7	53	0	0	0	0	0	0	0	59	0	0	0.473214	0
			♂	8	43	0	0	0	0	0	0	0	54	0	0	0.443299	0
			♂	9	44	0	0	0	0	0	0	0	40	0	0	0.52381	0
			♂	10	35	0	0	0	0	0	0	0	32	0	0	0.522388	0
			♂	11	65	0	0	0	0	0	0	0	73	0	0	0.471014	0
			♂	12	51	0	0	0	0	0	0	0	42	0	0	0.548387	0
			♂	13	46	0	0	0	0	0	0	0	32	0	0	0.589744	0
			♂	14	47	0	0	0	0	1	0	0	41	0	0	0.539326	0
			♂	15	52	0	0	0	0	0	0	0	42	0	0	0.553191	0
			♂	16	66	0	0	0	0	0	0	0	45	0	0	0.594595	0
			♂	17	62	0	0	1	0	0	0	0	55	0	0	0.525424	0
			♂	18	63	0	0	1	0	0	0	0	51	0	0	0.547826	0
			♂	19	45	0	0	0	0	0	0	0	51	0	0	0.46875	0
			♂	20	43	0	0	0	0	0	0	0	41	0	0	0.511905	0
														Average =	0	0.52047	0
														St Dev =	0	0.0398312	0
				cross	G3 ♂w[U6b-GDe]/w+; exu-Cas9/+ X ♀w+/w+										Somatic	Transmission
					G4 ♀ progeny					G4 ♂ progeny					white	GDe	w-
					TW	Tw	Tm	tW	tw	TW	Tw	Tm	tW	tw	mosaicism	rate	rate
			♂	1	47	0	0	0	0	0	0	0	52	0	0	0.474747	0
			♂	2	43	0	0	0	0	0	0	0	55	0	0	0.438776	0
			♂	3	52	0	0	0	0	1	0	0	51	0	0	0.509615	0
			♂	4	50	0	0	0	0	0	0	0	46	0	0	0.520833	0
			♂	5	45	0	0	1	0	0	0	0	53	0	0	0.454545	0
			♂	6	56	0	0	0	0	0	0	0	42	0	0	0.571429	0
			♂	7	37	0	0	0	0	0	0	0	44	0	0	0.45679	0
			♂	8	32	0	0	0	0	0	0	0	42	0	0	0.432432	0
			♂	9	42	0	0	0	0	1	0	0	51	0	0	0.457447	0
			♂	10	51	0	0	0	0	0	0	0	56	0	0	0.476636	0
			♂	11	50	0	0	0	0	0	0	0	62	0	0	0.446429	0
			♂	12	63	0	0	1	0	0	0	0	46	0	0	0.572727	0
			♂	13	53	0	0	0	0	0	0	0	55	0	0	0.490741	0
			♂	14	57	0	0	0	0	0	0	0	53	0	0	0.518182	0
			♂	15	37	0	0	0	0	0	0	0	46	0	0	0.445783	0
			♂	16	44	0	0	0	0	0	0	0	53	0	0	0.453608	0
			♂	17	49	0	0	0	0	0	0	0	61	0	0	0.445455	0
			♂	18	50	0	0	0	0	0	0	0	51	0	0	0.49505	0
			♂	19	41	0	0	0	0	2	0	0	55	0	0	0.438776	0
			♂	20	37	0	0	0	0	0	0	0	45	0	0	0.45122	0
														Average =	0	0.477561	0
														St Dev =	0	0.0420492	0
				cross	G4 ♂w[U6b-GDe]/w+; exu-Cas9/+ X ♀w+/w+										Somatic	Transmission
					G5 ♀ progeny					G5 ♂ progeny					white	GDe	w-
					TW	Tw	Tm	tW	tw	TW	Tw	Tm	tW	tw	mosaicism	rate	rate
			♂	1	54	0	0	0	0	0	0	0	62	0	0	0.465517	0
			♂	2	56	0	0	0	0	0	0	0	43	0	0	0.565657	0
			♂	3	44	0	0	0	0	0	0	0	49	0	0	0.473118	0
			♂	4	39	0	0	0	0	0	0	0	33	0	0	0.541667	0
			♂	5	39	0	0	0	0	2	0	0	43	0	0	0.488095	0
			♂	6	51	0	0	0	0	0	0	0	55	0	0	0.481132	0
			♂	7	54	0	0	0	0	0	0	0	46	0	0	0.54	0
			♂	8	41	0	0	0	0	0	0	0	53	0	0	0.43617	0
			♂	9	44	0	0	0	0	0	0	0	37	0	0	0.54321	0
			♂	10	62	0	0	0	0	0	0	0	65	0	0	0.488189	0
			♂	11	52	0	0	0	0	0	0	0	54	0	0	0.490566	0
			♂	12	57	0	0	0	0	0	0	0	51	0	0	0.527778	0
			♂	13	44	0	0	0	0	0	0	0	47	0	0	0.483516	0
			♂	14	52	0	0	0	0	0	0	0	45	0	0	0.536082	0
			♂	15	53	0	0	0	0	0	0	0	55	0	0	0.490741	0
			♂	16	36	0	0	0	0	0	0	0	34	0	0	0.514286	0
			♂	17	50	0	0	0	0	0	0	0	52	0	0	0.490196	0
			♂	18	48	0	0	0	0	0	0	0	50	0	0	0.489796	0
			♂	19	53	0	0	0	0	0	0	0	45	0	0	0.540816	0
			♂	20	62	0	0	0	0	0	0	0	54	0	0	0.534483	0
														Average =	0	0.506051	0
														St Dev =	0	0.033391	0

## Sheet: Supplementary File 5d
Legend:			Supplementary File 5d. Eye phenotypes in G3, G4, G5 progeny from ♂w[U6b-GDe]/w+; nup50-Cas9/+ X ♀w+/w+ (wt).
Phenotype	code
tdTomato+	T			cross	G2 ♂w[U6b-GDe]/w+; nup50-Cas9/+ X ♀w+/w+										Somatic	Transmission
tdTomato-	t				G3 ♀ progeny					G3 ♂ progeny					white	GDe	w-
Black eyes	W				TW	Tw	Tm	tW	tw	TW	Tw	Tm	tW	tw	mosaicism	rate	rate
Mosaic eyes	m		♂	1	32	0	36	0	0	0	0	0	33	0	0.529412	0.673267	0
White eyes	w		♂	2	37	0	42	0	0	0	0	0	27	0	0.531646	0.745283	0
			♂	3	27	0	23	0	0	0	0	0	31	0	0.46	0.617284	0
			♂	4	27	0	33	0	0	0	0	0	25	0	0.55	0.705882	0
			♂	5	32	0	28	0	0	0	0	0	26	0	0.466667	0.697674	0
			♂	6	45	0	31	0	0	0	0	0	32	0	0.407895	0.703704	0
			♂	7	42	0	35	2	0	0	0	0	37	0	0.454545	0.663793	0
			♂	8	30	0	31	0	0	0	0	0	24	0	0.508197	0.717647	0
			♂	9	32	0	25	0	0	0	0	0	29	0	0.438596	0.662791	0
			♂	10	45	0	41	0	0	0	0	0	36	0	0.476744	0.704918	0
			♂	11	36	0	43	0	0	0	0	0	47	0	0.544304	0.626984	0
			♂	12	27	0	22	0	0	0	0	0	31	0	0.44898	0.6125	0
			♂	13	32	0	35	0	0	0	0	0	37	0	0.522388	0.644231	0
			♂	14	35	0	37	0	0	0	0	0	29	0	0.513889	0.712871	0
			♂	15	28	0	24	0	0	0	0	0	25	0	0.461538	0.675325	0
			♂	16	29	0	35	0	0	0	0	0	31	0	0.546875	0.673684	0
			♂	17	26	0	25	0	0	0	0	0	22	0	0.490196	0.69863	0
			♂	18	41	0	43	0	0	0	0	0	36	0	0.511905	0.7	0
			♂	19	45	0	44	0	0	0	0	0	38	0	0.494382	0.700787	0
			♂	20	26	0	21	0	0	0	0	0	29	0	0.446809	0.618421	0
														Average =	0.490248	0.677784	0
														St Dev =	0.0411281	0.037727	0
				cross	G3 ♂w[U6b-GDe]/w+; nup50-Cas9/+ X ♀w+/w+										Somatic	Transmission
					G4 ♀ progeny					G4 ♂ progeny					white	GDe	w-
					TW	Tw	Tm	tW	tw	TW	Tw	Tm	tW	tw	mosaicism	rate	rate
			♂	1	25	0	26	0	0	0	0	0	28	0	0.509804	0.64557	0
			♂	2	30	0	27	1	0	0	0	0	31	0	0.473684	0.640449	0
			♂	3	25	0	32	0	0	0	0	0	25	0	0.561404	0.695122	0
			♂	4	42	0	40	0	0	0	0	0	42	0	0.487805	0.66129	0
			♂	5	27	0	22	0	0	0	0	0	23	0	0.44898	0.680556	0
			♂	6	34	0	33	1	0	0	0	0	27	0	0.492537	0.705263	0
			♂	7	41	0	45	0	0	0	0	0	28	0	0.523256	0.754386	0
			♂	8	27	0	21	0	0	1	0	0	23	0	0.428571	0.680556	0
			♂	9	42	0	33	0	0	0	0	0	30	0	0.44	0.714286	0
			♂	10	27	0	25	0	0	0	0	0	22	0	0.480769	0.702703	0
			♂	11	25	0	23	0	0	0	0	0	45	0	0.479167	0.516129	0
			♂	12	19	0	17	0	0	0	0	0	14	0	0.472222	0.72	0
			♂	13	32	0	24	0	0	0	0	0	56	0	0.428571	0.5	0
			♂	14	23	0	29	0	0	1	0	0	27	0	0.54717	0.6625	0
			♂	15	33	0	30	0	0	0	0	0	42	0	0.47619	0.6	0
			♂	16	24	0	34	0	0	0	0	0	35	0	0.586207	0.623656	0
			♂	17	26	0	31	0	0	0	0	0	34	0	0.54386	0.626374	0
			♂	18	52	0	41	0	0	0	0	0	32	0	0.44086	0.744	0
			♂	19	26	0	24	0	0	0	0	0	21	0	0.48	0.704225	0
			♂	20	38	0	29	0	0	0	0	0	34	0	0.432836	0.663366	0
														Average =	0.486695	0.662022	0
														St Dev =	0.046056	0.0662121	0
				cross	G4 ♂w[U6b-GDe]/w+; nup50-Cas9/+ X ♀w+/w+										Somatic	Transmission
					G5 ♀ progeny					G5 ♂ progeny					white	GDe	w-
					TW	Tw	Tm	tW	tw	TW	Tw	Tm	tW	tw	mosaicism	rate	rate
			♂	1	33	0	30	0	0	0	0	0	23	0	0.47619	0.732558	0
			♂	2	42	0	35	0	0	0	0	0	27	0	0.454545	0.740385	0
			♂	3	35	0	38	0	0	2	0	0	41	0	0.506667	0.646552	0
			♂	4	26	0	29	0	0	0	0	0	22	0	0.527273	0.714286	0
			♂	5	33	0	30	0	0	0	0	0	27	0	0.47619	0.7	0
			♂	6	41	0	36	0	0	0	0	0	38	0	0.467532	0.669565	0
			♂	7	27	0	28	0	0	0	0	0	30	0	0.509091	0.647059	0
			♂	8	33	0	32	0	0	0	0	0	24	0	0.492308	0.730337	0
			♂	9	37	0	26	0	0	0	0	0	25	0	0.412698	0.715909	0
			♂	10	21	0	17	3	0	0	0	0	30	0	0.447368	0.535211	0
			♂	11	24	0	26	0	0	0	0	0	32	0	0.52	0.609756	0
			♂	12	32	0	27	0	0	0	0	0	29	0	0.457627	0.670455	0
			♂	13	25	0	32	2	0	0	0	0	30	0	0.561404	0.640449	0
			♂	14	40	0	33	0	0	0	0	0	32	0	0.452055	0.695238	0
			♂	15	25	0	22	0	0	1	0	0	22	0	0.458333	0.685714	0
			♂	16	27	0	30	0	0	0	0	0	31	0	0.526316	0.647727	0
			♂	17	34	0	29	0	0	0	0	0	25	0	0.460317	0.715909	0
			♂	18	42	0	36	0	0	0	0	0	33	0	0.461538	0.702703	0
			♂	19	36	0	34	0	0	0	0	0	31	0	0.485714	0.693069	0
			♂	20	28	0	24	0	0	0	0	0	19	0	0.461538	0.732394	0
														Average =	0.480735	0.681264	0
														St Dev =	0.0352314	0.0500888	0
