# Supplementary material for: Development of a confinable gene drive system in the human disease vector Aedes aegypti
Source: eLife. 2020 Jan 21;9:e51701. doi: 10.7554/eLife.51701 (PMC6974361; doi:10.7554/eLife.51701)
Supplement: Supplementary file 6. [file elife-51701-supp6.xlsx]

## Sheet: Supplementary File 6
Legend:			Supplementary File 6. Eye phenotypes in progeny from the w- mosquitoes sampled at G2, G3, G4, and G5 (w[U6b-GDe]/w+; nup50-Cas9/+ X w+/w+) and w∆19/w∆19 reference mosquitos.
Phenotype	code					Progeny phenotypes				Progeny phenotypes				w[U6b-GDe]	inferred	w[U6b-GDe]	w[U6b-GDe] & Nix
tdTomato+	T					♀️				♂				Transmission	genotype	expected	linkage group	w–
tdTomato-	t		Generation	#	founder phenotype	Tw	tw	TW	tW	Tw	tw	TW	tW	rate	of parent	Transmission rate	on chrom. I	mutation
Black eyes	W		G2	1	♀️ Tw	22	26	―	―	24	23	―	―	0.484211	w[U6b-GDe]/w-	0.5	RED+, Nix–	germline
Mosaic eyes	m			2	♀️ Tw	26	28	―	―	29	23	―	―	0.518868	w[U6b-GDe]/w-	0.5	RED+, Nix–	germline
White eyes	w			3	♀️ tw	―	50	―	―	―	54	―	―	0	w-/w-	0	N/A	germline
				4	♀️ tw	―	42	―	―	―	45	―	―	0	w-/w-	0	N/A	germline
				5	♂ Tw	62	―	―	―	―	59	―	―	0.512397	w[U6b-GDe]/w-	0.5	RED+, Nix–	germline
				6	♂ Tw	44	―	―	―	―	37	―	―	0.54321	w[U6b-GDe]/w-	0.5	RED+, Nix–	germline
				7	♂ Tw	55	―	―	―	―	50	―	―	0.52381	w[U6b-GDe]/w-	0.5	RED+, Nix–	germline
			G3	1	♀️ Tw	27	23	―	―	29	28	―	―	0.523364	w[U6b-GDe]/w-	0.5	N/A	germline
				2	♀️ tw	―	54	―	―	―	59	―	―	0	w-/w-	0	N/A	germline
				3	♂ Tw	65	―	―	―	―	57	―	―	0.532787	w[U6b-GDe]/w-	0.5	RED+, Nix–	germline
				4	♂ tw	―	47	―	―	―	52	―	―	0	w-/w-	0	N/A	germline
				5	♂ tw	―	41	―	―	―	45	―	―	0	w-/w-	0	N/A	germline
			G4	1	♀️ Tw	26	30	―	―	31	26	―	―	0.504425	w[U6b-GDe]/w-	0.5	RED+, Nix–	germline
				2	♀️ Tw	24	26	―	―	27	27	―	―	0.490385	w[U6b-GDe]/w-	0.5	RED+, Nix–	germline
				3	♀️ Tw	21	22	―	―	25	28	―	―	0.479167	w[U6b-GDe]/w-	0.5	RED+, Nix–	germline
				4	♀️ Tw	20	20	―	―	21	18	―	―	0.518987	w[U6b-GDe]/w-	0.5	RED+, Nix–	germline
				5	♂ Tw	55	―	―	―	―	62	―	―	0.470085	w[U6b-GDe]/w-	0.5	RED+, Nix–	germline
			G5	1	♀️ Tw	26	25	―	―	21	23	―	―	0.494737	w[U6b-GDe]/w-	0.5	RED+, Nix–	germline
				2	♀️ tw	―	36	―	―	―	39	―	―	0	w-/w-	0	N/A	germline
				3	♀️ tw	―	44	―	―	―	48	―	―	0	w-/w-	0	N/A	germline
				4	♀️ tw	―	46	―	―	―	39	―	―	0	w-/w-	0	N/A	germline
				5	♂ Tw	53	―	―	―	―	48	―	―	0.524752	w[U6b-GDe]/w-	0.5	RED+, Nix–	germline
				6	♂ Tw	51	―	―	―	―	57	―	―	0.472222	w[U6b-GDe]/w-	0.5	RED+, Nix–	germline
				7	♂ tw	―	54	―	―	―	51	―	―	0	w-/w-	0	N/A	germline
				8	♂ tw	―	62	―	―	―	57	―	―	0	w-/w-	0	N/A	germline
