# Supplementary material for: Development of a confinable gene drive system in the human disease vector Aedes aegypti
Source: eLife. 2020 Jan 21;9:e51701. doi: 10.7554/eLife.51701 (PMC6974361; doi:10.7554/eLife.51701)
Supplement: Supplementary file 7. — (a) Effect of transgenes on fitness. Comparisons of several fitness parameters between wildtype (WT) and transgenic lines expressing gRNAs targeting the w gene (wU6b-GDe) only, Cas9 only (nup50-Cas9) or both gRNAs targeting the w gene and Cas9 (wU6b-GDe/nup50-Cas9). The transgenic and WT mosquitoes only differed significantly in one fitness parameter, female fecundity, which suggests that the transgenic strains do not have a major impact on mosquito fitness. The survivorship of transgenic versus WT mosquitoes is also shown. (b) Parameter values used in Ae. aegypti population model. (Carvalho et al., 2015; Christophers, 1960; Focks et al., 1993; Horsfall, 1972; Otero et al., 2006; Simoy et al., 2015; Taylor et al., 2001). [file elife-51701-supp7.xlsx]

## Sheet: Supplementary File 7a
Supplementary File 7a. Effect of transgenes on fitness. Comparisons of several fitness parameters between wildtype (WT) and transgenic lines expressing gRNAs targeting the w gene (wU6b-GDe) only, Cas9 only (nup50-Cas9) or both gRNAs targeting the w gene and Cas9 (wU6b-GDe/nup50-Cas9). The transgenic and WT mosquitoes only differed significantly in one fitness parameter, female fecundity, which su…
	Strain
Fitness Parameter	WT	wU6b-GDe	nup50-Cas9	wU6b-GDe/nup50-Cas9	P-value
	(N)	(N)	(N)	(N)
Female
Fecundity ᶿ†§	122.3 ± 5.15 (10)	111.4 ± 3.69 (10)	97.8 ± 3.04 (10)**	95.9 ± 3.44 (10)**	<0.0001
Egg hatch rate ᶿ‖§	0.87 ± 0.05 (10; 1,088)	0.89 ± 0.02 (10; 998)	0.87 ± 0.01 (10; 851)	0.88 ± 0.02 (10; 847)	0.9302
Larval to pupal development in daysᶿ§	7.45 ± 0.13 (100)	7.45 ± 0.15 (100)	7.45 ± 0.15 (100)	7.55 ± 0.15 (100)	0.9554
Median survival in days ††	47.5 (10)	53.5 (10)	43 (10)	46.5 (10)	>0.05
Male
Fecundity ᶿο§	1106 ± 151.2 (5; 5,528)	1053 ± 187.4 (5; 5,264)	1099 ± 161.5 (5; 5,495)	1107 ± 86.1 (5; 5,537)	0.993
Egg hatch rate ᶿⅢ§	0.92 ± 0.02 (5; 5,090)	0.91 ± 0.18 (5; 4,763)	0.89 ± 0.02 (5; 4,896)	0.89 ± 0.01 (5; 4,957)	0.6901
Larval to pupal development in days ᶿ§	6.7 ± 0.11 (100)	6.9 ± 0.14 (100)	6.9 ± 0.13 (100)	6.7 ± 0.08 (100)	0.4252
Mating competitiveness ***#	--	0.43 (30)	0.53 (30)	0.50 (30)	0.7325
Median survival in days ††	16 (10)	14.5 (10)	13 (10)	12.5 (10)	>0.05
ᶿMean ± SEM reported.
†Average number of eggs laid per female (Number of females scored; total number of eggs counted).
‖Percentage of laid eggs that produced larvae (Number of females scored; total number of larvae counted).
οAverage number of eggs laid per single male outcross (Number of male outcrosses scored; total number of eggs counted).
ⅢProportion of laid eggs that produced larvae per single male outcross (Number of male outcrosses scored; total number of larvae counted).
§One-way ANOVA and Tukey post-hoc test
††Mantel-Cox test
** p<0.001
Cross set up as 1 transgenic male: 1 WT male: 1 WT female
***Fraction of crosses that produced transgenic larvae (Number of male outcrosses scored)
#Chi-squared test

## Sheet: Supplementary File 7b
Supplementary File 7b. Parameter values used in Aedes aegypti population model.
System	Parameter	Value	Reference
General	Egg production per female (day-1)	20	(Otero et al., 2006)
	Duration of egg stage (days)	5	(Christophers, 1960)
	Duration of larval stage (days)	6	(Christophers, 1960)
	Duration of pupal stage (days)	4	(Christophers, 1960)
	Daily population growth rate (day-1)	1.175	(Simoy et al., 2015)
	Daily mortality risk of adult stage (day-1)	0.09	(Focks et al., 1993; Horsfall, 1972)
	Adult female population size	10000	(Carvalho et al., 2015)
	Migration rate (mosquito-1 day-1)	0.01	(Taylor et al., 2001)
Split or linked homing drive	Cleavage rate (female)	0.788	This paper
	Cleavage rate (male)	0.48	This paper
	Frequency of accurate homology-directed repair (HDR) given cleavage (female)	0.798	This paper
	Frequency of accurate HDR given cleavage (male)	0.769	This paper
	Proportion of non-HDR events that lead to in-frame/cost-free resistant alleles	0.167
	Reduction in female fecundity per Cas9 allele	0.078	This paper
All systems	Reduction in adult lifespan for gRNA/refractory allele homozygotes	0.1
References
Carvalho DO, McKemey AR, Garziera L, Lacroix R, Donnelly CA, Alphey L, Malavasi A, Capurro ML. 2015. Suppression of a field population of Aedes aegypti in Brazil by Sustained Release of Transgenic Male Mosquitoes. PLOS Neglected Tropical Diseases 9:e0003864. PubMed: 26135160. DOI: 10.1371/journal.pntd.0003864
Christophers SR. 1960. Aedes Aegypti (L.), the Yellow Fever Mosquito: Its Life History, Bionomics, and Structure. London: Cambridge University Press.
Focks DA, Haile DG, Daniels E, Mount GA. 1993. Dynamic life table model for aedes aegypti (Diptera: culicidae): analysis of the literature and model development. Journal of Medical Entomology 30:1003–1017. PubMed: 8271242. DOI: 10.1093/jmedent/30.6.1003
Horsfall WR. 1972. Mosquitoes: Their Bionomics and Relation to Disease. New York: Hafner Publishing Company.
Otero M, Solari HG, Schweigmann N. 2006. A stochastic population dynamics model for aedes aegypti: formulation and application to a city with temperate climate. Bulletin of Mathematical Biology 68:1945–1974. PubMed: 16832731. DOI: 10.1007/s11538-006-9067-y
Simoy MI, Simoy MV, Canziani GA. 2015. The effect of temperature on the population dynamics of Aedes aegypti. Ecological Modelling 314:100–110. DOI: 10.1016/j.ecolmodel.2015.07.007
Taylor C, Touré YT, Carnahan J, Norris DE, Dolo G, Traoré SF, Edillo FE, Lanzaro GC. 2001. Gene flow among populations of the malaria vector, Anopheles Gambiae, in Mali, West Africa. Genetics 157:743–750. PubMed: 11156993
