# Supplementary material for: Development of a confinable gene drive system in the human disease vector Aedes aegypti
Source: eLife. 2020 Jan 21;9:e51701. doi: 10.7554/eLife.51701 (PMC6974361; doi:10.7554/eLife.51701)
Supplement: Supplementary file 8. — (a) Key resources table (b) Primer sequences used in this study. [file elife-51701-supp8.xlsx]

## Sheet: Supplementary File 8a
Supplementary File 8a: Key Resources Table
Key Resources Table
Reagent type (species) or resource	Designation	Source or reference	Identifiers	Additional information
gene	white	PMID: 17510324; PMID: 30429615	AAEL016999 (VectorBase)
white (Aedes aegypti)
strain	wt	PMID: 17510324; PMID: 30429615
Liverpool, strain background (Ae. aegypti)
genetic reagent (host species: Ae. aegypti)	U6a-GDe	This paper		Figure 1- figure supplement 2D
genetic reagent (host species: Ae. aegypti)	U6b-GDe	This paper		Figure 1- figure supplement 2D
genetic reagent (host species: Ae. aegypti)	U6c-GDe	This paper		Figure 1- figure supplement 2D
genetic reagent (host species: Ae. aegypti)	U6d-GDe	This paper		Figure 1- figure supplement 2D
genetic reagent (host species: Ae. aegypti)	exu-Cas9	PMID: 29138316
genetic reagent (host species: Ae. aegypti)	ubiq-Cas9	PMID: 29138316
biological sample (Ae. aegypti)	California sample	PMID: 30866822		California strain
biological sample (Ae. aegypti)	Florida sample	PMID: 30866822		Florida strain
biological sample (Ae. aegypti)	Puerto Rico sample	PMID: 30866822		Puerto Rico strain
biological sample (Ae. aegypti)	Mexico sample	PMID: 30866822		Mexico strain
biological sample (Ae. aegypti)	South Africa sample	PMID: 30866822		South Africa strain
recombinant DNA reagent	piggyBac (Plasmid)	PMID: 24492376
recombinant DNA reagent	eGFP	Addgene	RRID:Addgene_100705
recombinant DNA reagent	3xP3 promoter	Addgene	RRID:Addgene_104968
recombinant DNA reagent	Opie2-dsRed-SV40 fragment	Addgene	RRID:Addgene_100705
recombinant DNA reagent	3xP3-tdTomato-SV40 fragment	Addgene	RRID:Addgene_104968
recombinant DNA reagent	5’-end flanking sequence of the U6 snRNA (promoter region)	gBLOCK by IDT®
recombinant DNA reagent	gRNAw	GenScript		For plasmid building
recombinant DNA reagent	gRNA scaffold	GenScript
recombinant DNA reagent	Synthetic gRNAw-scaffold	Synthego		For mutation screening
recombinant DNA reagent	U6a-T(Plasmid)	This paper		Figure 1- figure supplement 2C
recombinant DNA reagent	U6b-T(Plasmid)	This paper		Figure 1- figure supplement 2C
recombinant DNA reagent	U6c-T (Plasmid)	This paper		Figure 1- figure supplement 2C
recombinant DNA reagent	U6d-T (Plasmid)	This paper		Figure 1- figure supplement 2C
recombinant DNA reagent	U6e-T (Plasmid)	This paper		Figure 1- figure supplement 2C
recombinant DNA reagent	U6f-T (Plasmid)	This paper		Figure 1- figure supplement 2C
recombinant DNA reagent	U6a-GDe (Plasmid)	This paper		Figure 1- figure supplement 2D
recombinant DNA reagent	U6b-GDe (Plasmid)	This paper		Figure 1- figure supplement 2D
recombinant DNA reagent	U6c-GDe (Plasmid)	This paper		Figure 1- figure supplement 2D
recombinant DNA reagent	U6d-GDe (Plasmid)	This paper		Figure 1- figure supplement 2D
sequence-based reagent	AE01	This paper	PCR primers	Supplementary file 8b
sequence-based reagent	AE02	This paper	PCR primers	Supplementary file 8b
sequence-based reagent	AE03	This paper	PCR primers	Supplementary file 8b
sequence-based reagent	AE04	This paper	PCR primers	Supplementary file 8b
sequence-based reagent	AE05	This paper	PCR primers	Supplementary file 8b
sequence-based reagent	AE06	This paper	PCR primers	Supplementary file 8b
sequence-based reagent	AE07	This paper	PCR primers	Supplementary file 8b
sequence-based reagent	AE08	This paper	PCR primers	Supplementary file 8b
sequence-based reagent	AE09	This paper	PCR primers	Supplementary file 8b
sequence-based reagent	AE10	This paper	PCR primers	Supplementary file 8b
sequence-based reagent	AE11	This paper	PCR primers	Supplementary file 8b
sequence-based reagent	AE12	This paper	PCR primers	Supplementary file 8b
sequence-based reagent	AE13	This paper	PCR primers	Supplementary file 8b
sequence-based reagent	AE14	This paper	PCR primers	Supplementary file 8b
sequence-based reagent	AE15	This paper	PCR primers	Supplementary file 8b
sequence-based reagent	AE16	This paper	PCR primers	Supplementary file 8b
sequence-based reagent	AE17	This paper	PCR primers	Supplementary file 8b
sequence-based reagent	AE18	This paper	PCR primers	Supplementary file 8b
sequence-based reagent	AE19	This paper	PCR primers	Supplementary file 8b
sequence-based reagent	AE20	This paper	PCR primers	Supplementary file 8b
sequence-based reagent	AE21	This paper	PCR primers	Supplementary file 8b
sequence-based reagent	AE22	This paper	PCR primers	Supplementary file 8b
sequence-based reagent	AE23	This paper	PCR primers	Supplementary file 8b
sequence-based reagent	AE24	This paper	PCR primers	Supplementary file 8b
sequence-based reagent	AE25	This paper	PCR primers	Supplementary file 8b
commercial assay or kit	Plasmid Miniprep	Zymo Research	#D4037
commercial assay or kit	Plasmid Maxiprep	Zymo Research	#D4028
commercial assay or kit	DNeasy Blood & Tissue Kit	QIAGEN	Cat No./ID: 69504
chemical compound, drug	recombinant Streptococcus pyogenes Cas9 protein	PNA Bio Inc.	CP01-50
software, algorithm	Freebayes v1.0.1	Freebayes v1.0.1
software, algorithm	BWA-MEM v0.7.15	arXiv:1303.3997 [q-bio.GN]
software, algorithm	GraphPad Prism Software	GraphPad
software, algorithm	MGDrivE simulation framework	https://doi.org/10.1111/2041-210X.13318		https://marshalllab.github.io/MGDrivE/
software, algorithm	JMP 8.0.2	SAS Institute Inc.
software, algorithm	CleanTOPO2 basemap	http://www.shadedrelief.com/cleantopo2/
other	Tetramin fish food	PetSmart	#5118570
other	JM109 chemically competent cells	Zymo Research	#T3005	For cloning

## Sheet: Supplementary File 8b
Supplementary File 8b. Primer sequences used in this study.
Primer code	Primer Task	Primer sequence (5’–3’)
AE01	3Xp3 F	GCTCGCCCGGGCTTAAGAGCGCGCCGTTCCCACAATGGTTAATTCGAGCTCG
AE02	3Xp3 R	TCACCATGGTGGCGACCGGTGGATCGTACCGTCGACTCTAGCGGTACC
AE03	eGFP F	GTACGATCCACCGGTCGCCACCATGGTGAGCAAGGGCGAGGAGCTGTTCA
AE04	eGFP R	TATATAACTAAGATGAATGAGGGCCCGGCCGGCCTAGAAGCTTTAAGATACATTGATGA
AE05	U6a-F (P+gRNA)	ACAACCTTGCTGAACGCTTTGCTAGCACTTTCCAAAATTCATTTGGTAATTTCT
AE06	U6a-R (P+gRNA)	CACAATTATCGAATAGTAAAACCACAAAAAAAGCACCGACTCGGTGCCACTTTT
AE07	U6b-F (P+gRNA)	ACAACCTTGCTGAACGCTTTGCTAGCTCATCACAAACGAAACTATTATAATCG
AE08	U6b-R (P+gRNA)	CACTGCAATATTAGGAATCGATGAACAACCACCAAAAAAAGCACCGACTCGGT
AE09	U6c-F (P+gRNA)	ACAACCTTGCTGAACGCTTTGCTAGCATATGTCTTGCCGAAGCACATT
AE10	U6c-R (P+gRNA)	CCTTATTATTAATTGCCGAAGCATCTTAAAAAAAGCACCGACTCGGTGCC
AE11	U6d-F (P+gRNA)	ACAACCTTGCTGAACGCTTTGCTAGCTCATTCATCTTAGTTATATACTCAAT
AE12	U6d-R (P+gRNA)	AGTGGCACCGAGTCGGTGCTTTTTTTACAAATCTATTATGCATGAGGTACTA
AE13	U6 a3Xp3 td-sv40 F	CAGCATATACTTTCTGTTAGTTAATTAATTCGAGCTCGCCCGGGGATCTAAT
AE14	U6abcd 3Xp3 td-sv40 R	GGGCACGTACTGAAGTCGGTGCGATCTTGAGTTTAAACAAGCTTTAAGATACATTGATG
AE15	U6b 3Xp3 td-sv40 F	TTCAAGATTCCAGTATTGAGTTAATTAATTCGAGCTCGCCCGGGGATCTAATT
AE16	U6c 3Xp3 td-sv40 F	TGGACACCAAAACCGATTTCGTTAATTAATTCGAGCTCGCCCGGGGATCTAAT
AE17	U6d 3Xp3 td-sv40 F	ACGACGACCACCACAGGTGTTCTTAATTAATTCGAGCTCGCCCGGGGATC
AE18	U6 opie2 dsRed-sv40 F	AAACGACTTCAATCATTAGGGGCGCGCCCATACTCGGTGGCCTCCCCACCAC
AE19	U6 opie2 dsRed-sv40 R	ACTGAACATTGTCAGATCCGAGATCGGCCGGCCTAGAAGCTTTAAGATACATTGAT
AE20	Left Side Arm Integration Forward	GAGTCGAGAATTGTCACCTCGCTATACGATACCG
AE21	Left Side Arm Integration Reverse	CGGACTAGCCTTATCTTAACTTGCTATGCTGTTTCC
AE22	Right Side Arm Integration Forward	CACTGCATTCTAGTTGTGGTTTGTCCAAACTCATCAATGTATC
AE23	Right Side Arm Integration Reverse	TTCCAATACCTAATACATGCACTGTCACACTTTCCTAGACC
AE24	White mutation Forward	ATGGTTAATTCGAGCTCGCCCGGGGTTTAAACGCACGAACGACTCACATACA
AE25	White mutation Reverse	GTTGGTGGTGGGGAGGCCACCGAGTATGTTAATTAACTTGACACTCTTGGGTACATCTT
